1 **Rapid pacing by circulating traveling waves improves maturation of**  
2 **hiPSC-derived cardiomyocytes in self-organized tissue ring**

3

4 Junjun Li<sup>1,2#</sup>, Lu Zhang<sup>3#</sup>, Leqian Yu<sup>2</sup>, Itsunari Minami<sup>4</sup>, Marcel Hörning<sup>2,9</sup>, Ji Dong<sup>5</sup>, Jing  
5 Qiao<sup>2</sup>, Nanae Fujimoto<sup>1,2</sup>, Yuji Shiba<sup>6</sup>, Yang Zhao<sup>7</sup>, Fuchou Tang<sup>5</sup>, Shigeru Miyagawa<sup>1</sup>,  
6 Yong Chen<sup>2,8</sup>, Yoshiki Sawa<sup>1\*</sup>, Chao Tang<sup>3\*</sup> and Li Liu<sup>1,2\*</sup>

7

8 <sup>1</sup> Department of Cardiovascular Surgery, Osaka University Graduate School of Medicine, 2-2  
9 Yamadaoka, Suita, Osaka 565-0871, Japan

10 <sup>2</sup> Institutes for Integrated Cell-Material Sciences (WPI-iCeMS), Kyoto University, Yoshida-  
11 Ushinomiya-cho, Sakyo-ku, Kyoto 606-8501, Japan

12 <sup>3</sup> Center for Quantitative Biology and Peking-Tsinghua Center for Life Sciences, Academy  
13 for Advanced Interdisciplinary Studies, Peking University, Beijing 100871, China

14 <sup>4</sup> Department of Cell Design for Tissue Construction Faculty of Medicine, Osaka University,  
15 Osaka 565-0871, Japan

16 <sup>5</sup> Biomedical Pioneering Innovation Center, College of Life Sciences, Peking University,  
17 Beijing 100871, China

18 <sup>6</sup> Institute for Biomedical Sciences, Department of Regenerative Science and Medicine,  
19 Shinshu University, 3-1-1 Asahi, Matsumoto, Nagano 390-0821, Japan

20 <sup>7</sup> State Key Laboratory of Natural and Biomimetic Drugs, the MOE Key Laboratory of Cell  
21 Proliferation and Differentiation, Institute of Molecular Medicine, Peking-Tsinghua Center  
22 for Life Sciences, Peking University, Beijing 100871, China

23 <sup>8</sup> PASTEUR, Département de chimie, école normale supérieure, PSL Research University,  
24 Sorbonne Universités, UPMC Université Paris 06, CNRS, 75005, France

25 <sup>9</sup> Present address: Institute of Biomaterials and Biomolecular Systems, University of Stuttgart,  
26 70569 Stuttgart, Germany

27 # These authors contributed equally to this work.

28 \* Correspondence to: Li Liu (li-liu@surg1.med.osaka-u.ac.jp), Chao Tang  
29 (tangc@pku.edu.cn) and Yoshiki Sawa (sawa-p@surg1.med.osaka-u.ac.jp).

## 30 **Abstract**

31 Directed differentiation methods allow acquisition of high-purity cardiomyocytes (CMs)  
32 differentiated from human induced pluripotent stem cells (hiPSCs); however, their  
33 immaturity characteristic limits their application for drug screening and regenerative therapy.  
34 The rapid electrical pacing of cardiomyocytes have been used for efficiently promoting the  
35 maturation of cardiomyocytes, here we describe a simple device in modified culture plate on  
36 which hiPSC-derived CMs (hiPSC-CMs) can form three-dimensional self-organized tissue  
37 rings (SOTRs). Using calcium imaging, we show that within the ring, traveling waves (TWs)  
38 of action potential spontaneously originated and ran robustly at a frequency up to 4 Hz. After  
39 2 weeks, SOTRs with TW training showed matured features including structural organization,  
40 increased cardiac-specific gene expression, enhanced  $\text{Ca}^{2+}$ -handling properties, an increased  
41 oxygen-consumption rate, and enhanced contractile force. We subsequently used a  
42 mathematical model to interpret the origination, propagation, and long-term behavior of the  
43 TWs within the SOTRs. This new idea for spontaneous hiPSC-CM maturation also has  
44 potential for pacing the electrical excitable cells such as neuron and retina cells for various  
45 applications.

46

47

48

## 49 **Introduction**

50 Although human induced pluripotent stem cell-derived cardiomyocytes (hiPSC-CMs) have  
51 been proposed as an abundant resource for tissue engineering, drug screening, and  
52 regenerative-medicine applications<sup>1</sup>, they exhibit characteristics different from adult human  
53 CMs, including immature sarcomere structure and morphology, a fetus-like gene-expression  
54 profile, and inadequate  $\text{Ca}^{2+}$ -handling properties<sup>2-4</sup>. The immature nature of hiPSC-CMs

55 potentially hinders their reflection of adult heart physiology for disease modeling and drug  
56 assessment.

57 To achieve higher degrees of CM maturation and function, a variety of methods have  
58 been developed, including dynamic culture<sup>5</sup>, three-dimensional (3D) engineered heart  
59 tissue<sup>6,7</sup>, 3D printing<sup>8</sup>, addition of factors<sup>9</sup>, extracellular matrix<sup>9,10</sup>, and external stimulation.  
60 Electrical stimulation, especially high-frequency pacing, has long been suggested as an  
61 effective method for maturing muscle cells<sup>11-14</sup>, which upregulates cardiac markers<sup>12,13,15</sup>,  
62 enhances Ca<sup>2+</sup>-handling properties<sup>3</sup>, and promotes CM alignment<sup>16</sup>. During this process,  
63 appropriate stimulation protocols are required to minimize possible tissue damage<sup>17</sup>.  
64 Additionally, it remains challenging to rapidly pace CM tissues ( $\geq 2$  Hz) over long time<sup>18</sup> due  
65 to possible side effects, such as heavy metal poisoning, electrolysis, pH shift, and the  
66 generation of reactive oxygen species (ROS)<sup>19,20</sup>. Moreover, upscaling for mass stimulation is  
67 either difficult or requires high level of power consumption<sup>18</sup>. As an important complement,  
68 mechanical stimulation can promote CM maturation, with cyclic mechanical stress applied by  
69 external stretching devices capable of forcing muscle-cell assembly into structurally and  
70 functionally aligned 3D syncytium<sup>21</sup>, thereby affecting their gene expression<sup>22-24</sup> and Ca<sup>2+</sup>  
71 cycling<sup>25</sup>.

72 On another hand, spiral waves (traveling waves) within cardiac tissue have long been  
73 investigated as a model for arrhythmia studies<sup>26-29</sup>, and the rapid beating caused by in-vivo  
74 spiral wave could lead to dysfunction of heart and even death of a patient. However, when  
75 used in in-vitro condition, the rapid pacing by spiral wave, similar to rapid electrical  
76 stimulation, could be beneficial for cardiomyocytes maturation.

77 In this study, we created a platform capable of promoting rapid formation of hiPSC-  
78 CMs into 3D self-organized tissue rings (SOTRs), where propagation of an action potential in  
79 the form of traveling waves (TWs) can spontaneously originate and travel around the close-

80 looped circuit, thereby making the CMs beat at a high frequency (~2–4 Hz) continuously and  
81 robustly up to more than 89 days without any external stimulation. Additionally, we found  
82 that the beating frequency and the TW speed could be adjusted by changing the diameter of  
83 the ring. Furthermore, we constructed a mathematical model in order to elucidate the  
84 origination, propagation, and long-term behavior of the TWs, with the model ultimately  
85 agreeing well with the experimental data. After 2 weeks of training using the TWs, the  
86 SOTRs demonstrated improved structural organization, upregulated cardiac-specific gene  
87 expression, enhanced  $\text{Ca}^{2+}$ -handling properties, an increased oxygen-consumption rate (OCR),  
88 and enhanced contractile force.

89 Although the maturation level of CMs trained with TWs remains lower than that  
90 acquired using state-of-art methods<sup>13</sup>, the maturation process demonstrated in the present  
91 study was spontaneous and required no elaborate experimental setup and/or external  
92 stimulation. Moreover, the mass production of matured CMs would be possible by simply  
93 modifying conventional Petri dishes. Our results demonstrated a novel approach for  
94 promoting spontaneous CM maturation and could serve as an economical and practical  
95 system for future production of matured hiPSC-CMs.

96

## 97 **Results**

### 98 **Self-organization of a hiPSC-CM ring**

99 We created 3D SOTRs by plating hiPSC-CMs in a culture dish with a pillar in the center,  
100 around which the CMs aggregated and formed a thick tissue ring within 2 days (Fig. 1a–c and  
101 Supplementary Fig. 1). As indicated by the genetically encoded calcium indicator GCaMP,  
102 we found looped activation propagations within the SOTRs (i.e., TWs; Supplementary Video  
103 1), with from zero to three TWs present in one SOTR (Fig. 1d and e; and Supplementary  
104 Video 2).

105 A trace recording (Fig. 1d and e) indicated no long rest periods between successive  
106 TWs, resulting in higher beating rates in SOTRs capable of sustaining a higher number of  
107 TWs (Fig. 1e and f). The spontaneous beating rate of SOTRs with zero TWs was  $0.21 \pm 0.10$   
108 Hz on day 6 and remained stable for 2 weeks, whereas the rates of SOTRs with one or two  
109 TWs on day 6 were much higher ( $2.40 \pm 0.49$  Hz and  $3.30 \pm 0.39$  Hz, respectively). Notably,  
110 the wave speed in the TW groups was much lower ( $\sim 2$  cm/s) than that of the spontaneous  
111 beating group (0 TW;  $\sim 9$  cm/s). It is possible that the slower speed together with the  
112 shortened pacing interval and refractory period might be caused by the higher beating  
113 frequency in the TW groups relative to that in the zero TW group (Supplementary Fig. 2),  
114 which agrees with previous reports associated with excitable media<sup>30-34</sup>.

115 The beating rates of the one and two TW groups increased slightly over 2 weeks of  
116 culturing, reaching  $3.03 \pm 0.68$  Hz and  $3.92 \pm 0.69$  Hz on day 14, respectively. After a 6-day  
117 culture, 83.8% of 204 SOTRs had one or two TWs, 14.2% had zero TWs, and 2% had three  
118 TWs; however, these percentages changed after a 2-week culture to 28.5% with zero TWs,  
119 48.9% with one TW, 22.6% with two TWs, and no SOTRs with three TWs (Fig. 2d). Noise  
120 and disturbances, such as those during medium changing, might have provoked changes in  
121 and/or disappearance of TWs. In the long-term culture, we found that TWs could be  
122 maintained in SOTRs for  $>89$  days (Supplementary Fig. 3).

123 To better understand the nature of these TWs according to their organization,  
124 propagation, and long-time behavior, we constructed a mathematical model (Supplementary  
125 Information and Supplementary Fig. 4) comprising a ring of cells, each of which can beat  
126 spontaneously with an intrinsic frequency. The total number of the cells in each ring in the  
127 model is proportional to the diameter of the ring. The coupling between neighboring cells  
128 through gap junctions<sup>35,36</sup> gradually increases with time in order to simulate the self-  
129 organization and formation processes of the SOTR. Initially, all cells were independently set

130 to a random phase of beating, with all cells beating independently. As the gap junctions form  
131 and strengthen, the beating of one cell harbors an increasing probability of triggering beating  
132 in its neighboring cell, thereby forming a propagating wave. Initially, these waves are  
133 unsynchronized and short-lived, as they initiate, disappear, and sometimes meet and collide  
134 (Supplementary Video 3). Over time, a SOTR is left with one dominant propagating-wave  
135 mode comprising zero or more TWs (Fig. 2a and Supplementary Video 3), with this process  
136 similar to that observed in our experimental findings (Supplementary Video 4). Notably,  
137 SOTRs with one or two TWs accounted for most of the simulation samples, a trend also  
138 observed in our experimental results (Fig. 2b).

139 We then investigated how TW features and properties were affected by characteristics,  
140 such as ring diameter, in the mathematical model and experiments. The beating frequency of  
141 cells in SOTRs decreased with increasing ring diameter, as shown with one TW in Fig. 2c.  
142 We noted that a constant TW speed implied a linear decrease in beating frequency with ring  
143 diameter (which is proportional to the ring perimeter), and that the greater the perimeter, the  
144 more time the wave would spend to travel around it. However, the data in Fig. 2c show a  
145 slower-than-linear decrease; therefore, we measured the wave speed, finding that it increased  
146 along with ring diameter in both the simulation and experiment (Fig. 2d). As discussed in the  
147 Supplementary Information, this was due to the ability of a single hiPSC-CM to  
148 spontaneously beat. Cells in larger rings would wait longer for the next TW to arrive, thereby  
149 making them easier to be activated by the wave front and resulting in a faster wave speed.  
150 This insight allowed us to predict the speed of two and three TWs. As shown in Fig. 2e, the  
151 prediction agreed well with our experimental results. Additionally, the mathematical model  
152 showed that the maximum number of TWs that a SOTR could sustain increased along with  
153 ring diameter, which was confirmed experimentally (Fig. 2f). Here, the mathematical model  
154 predicted that SOTRs with a diameter of 17 mm could contain as many as 19 TWs.

155 Experimentally, we found that SOTRs with a 3-mm pillar were optimal based on their highest  
156 occurrence of TWs (~90% at  $\geq 1$  TW) (Supplementary Fig. 5). Moreover, the beating  
157 frequency of one TW was only slightly slower than that in SOTRs with a 1-mm pillar;  
158 therefore, SOTRs with a 3-mm pillar were chosen for subsequent investigations.

159

### 160 **TWs promote genetic and structural maturation of hiPSC-CMs**

161 The human fetal heart rate varies, although it generally stabilizes at ~3 Hz, whereas the adult  
162 human heart rate is ~1 Hz<sup>37</sup>. Electrical stimulation has been used to mature CMs by pacing  
163 their beating at a certain higher-than-normal frequency relative to a normal human rate<sup>3</sup>;  
164 however, continuous and high electrical stimulation can cause cell damage. Here, TWs within  
165 the SOTRs were able to make the CMs beat at various frequencies in the absence of external  
166 stimulation.

167 We used RNA sequencing to compare gene-expression profiles among different  
168 groups. Principal component analysis (PCA; Fig. 3a) and hierarchical clustering of Spearman  
169 correlation results (Fig. 3b) showed closer correlations between hiPSC-CMs receiving  
170 training by TWs as compared with those without TW training. Additionally, we found  
171 different gene-expression patterns among zero, one, and two TW groups (Fig. 3c). Functional  
172 annotation according to Gene Ontology (GO) analysis revealed that upregulated genes  
173 (adjusted  $P < 0.05$ ; fold change  $> 1.5$ ) in SOTRs with two TWs relative to those with no TWs  
174 were related to the response to unfolded protein and a number of maturation-related terms.

175 Most of the GO-enriched terms were associated with cardiac development, including  
176 muscle-structure development, extracellular-structure organization, actin-filament-based  
177 processes, tissue morphogenesis, and muscle-system processes. The response to unfolded  
178 protein is a coping response to mitigate or eliminate endoplasmic reticulum (ER) stress  
179 caused by hypoxia<sup>38</sup>, which could result from the high-frequency beating of the SOTRs with

180 TWs. To verify these findings, we performed immunostaining and quantitative polymerase  
181 chain reaction (qPCR) analysis. Immunostaining for cardiac-specific markers clearly revealed  
182 higher expression of  $\beta$ -myosin heavy chain ( $\beta$ -MHC), a cardiac maturity marker correlated  
183 with contractile velocity, within SOTRs with one and two TWs as compared with levels  
184 observed in the zero TW group (Fig. 3e and f). Moreover, analysis of mRNA expression  
185 revealed a number of upregulated genes, including *MYH7* (encoding  $\beta$ -MHC) and genes  
186 involved in sarcomere structures (*ACTN2* and *DES*), ventricular structures (*MYL2*, *MYL3*),  
187 ER- $\text{Ca}^{2+}$  function (*PLN*), *myoglobin* (*MB*), and  $\beta$ 1-adrenoceptor (*ADRB1*). SOTRs with TWs  
188 had significantly higher-fold upregulated genes as compared with those with zero TWs (Fig.  
189 3e–g) due to higher beating rates during culture, which agreed well with previous reports  
190 utilizing electrical stimulation at different frequencies<sup>3,15</sup>.

191 Hematoxylin and eosin (HE) staining showed that CMs with TWs densely packed  
192 with each other to a greater degree than those without TWs (Supplementary Fig. 6).  
193 Moreover, SOTRs with TWs demonstrated densely packed cardiac myofilaments along the  
194 ring orientation, which was also along the path of the TWs, whereas CMs in SOTRs without  
195 TWs (0 TW) were randomly oriented and poorly organized (Fig. 4a and b). Additionally,  
196 after a 14-day culture, CMs in SOTRs with TWs strongly expressed the  $\alpha$ -actinin as  
197 compared with those in SOTRs without TWs (Fig. 4c), in agreement to gene expression  
198 (*ACTN2*, Fig. 3g). Importantly, CMs in SOTRs with TWs exhibited significantly longer  
199 sarcomere length than those without TWs (1 TW:  $1.71 \pm 0.08 \mu\text{m}$ ; 2 TWs:  $1.83 \pm 0.10 \mu\text{m}$ ;  
200 and 0 TW:  $1.49 \pm 0.08 \mu\text{m}$ ) (Fig. 4c and d), which is closer to the sarcomere length in human  
201 adult CMs<sup>39</sup>. Furthermore, electron microscopy indicated that cells in TW groups exhibited  
202 larger sarcomeric bundles, well-defined Z disks, A-bands, and myofibrils (Fig. 4e). These  
203 data suggested that CM maturation was improved within SOTRs with TWs relative to those  
204 with zero TWs. Our findings confirmed the genetic and structural maturation of SOTRs with



205 TWs, and that faster beating rates during short-term culture could lead to higher levels of  
206 maturation.

207

### 208 **TWs improve bioenergetics and Ca<sup>2+</sup>-handling properties**

209 An extracellular-flux analyzer was used to characterize mitochondrial function in CMs within  
210 SOTRs. To record the maximum activity of the electron-transport chain from adenosine  
211 triphosphate (ATP) synthesis, mitochondrial ATP synthase was inhibited by oligomycin, and  
212 a proton-gradient discharger was added to measure maximum mitochondrial respiration. Our  
213 results indicated that the maximum respiration rate of groups with two TWs was significantly  
214 higher than that observed in groups with zero or one TW (Fig. 5a and b), indicating that a  
215 higher number of TWs led to increased mitochondrial activity.

216 Because human CMs rely on Ca<sup>2+</sup> influx from the sarcoplasmic reticulum (SR) for  
217 contraction, we investigated SR function by applying caffeine to SOTRs in order to open SR  
218 ryanodine channels<sup>3</sup>. Although all groups responded to the addition of 5 mM caffeine (Fig. 5c  
219 and d), SOTRs with two TWs exhibited significantly higher-intensity changes than groups  
220 with zero TWs, indicating a higher maturation level in Ca<sup>2+</sup>-handling properties and agreeing  
221 well with gene-expression results. Additionally, we recorded the contractile force of SOTRs  
222 using a mechanical tester (Fig. 5e and f), revealing that SOTRs with either zero or two TWs  
223 generated active forces that increased along with an applied stretching force in a Frank–  
224 Starling-like fashion<sup>40</sup>. Moreover, the group with two TWs generated forces with larger  
225 amplitude than that in the group with zero TWs (2 TWs:  $0.54 \pm 0.15$  mN/mm<sup>2</sup>; 0 TW:  $0.23 \pm$   
226  $0.12$  mN/mm<sup>2</sup>).

227

### 228 **Discussion**

229 Excitation-contraction coupling is important for CM development and function<sup>41</sup>, and beating  
230 rate might play an important role in cardiac maturation. The human fetal heartbeat increases  
231 linearly during embryonic development from ~1 Hz to ~3 Hz within 9 weeks *in utero*<sup>42,43</sup>.  
232 hiPSC-CMs functionally and morphologically resemble fetal CMs; however, the average  
233 beating rate of hiPSC-CMs is much lower than human fetal CMs. Previous studies promoted  
234 CM maturation by increasing their beating rates; however, high beat rates of hiPSC-CMs  
235 could only be achieved by applying high frequency electrical stimulation<sup>3,13,15</sup>, sustainable  
236 application of which is technically challenging and may cause potential side effects,  
237 including pH shift, ROS generation, electrolysis<sup>19</sup>, and cell damage<sup>17</sup>.

238 In the present study, we created SOTRs with spontaneously generated TWs capable of  
239 sustainably causing CMs to beat at high frequencies (up to 4 Hz) in the absence of external  
240 stimulation. We found that CMs trained with TWs demonstrated dramatically improved  
241 structural maturation, enhanced cardiac gene expression, and Ca<sup>2+</sup>-handling properties in a  
242 frequency dependent manner. Because this activity might also cause hypoxia in SOTRs, in  
243 the future, an enhanced oxygen supply, such as that afforded by dynamic culture<sup>5</sup>, can be  
244 utilized during SOTR culture. Additionally, although the CMs trained by TWs remained less  
245 mature relative to those generated by state-of-art methods<sup>10,13,44</sup>, the maturation level afforded  
246 by TWs could be further improved by changing the stimulation window/duration and  
247 improving the beating frequency.

248 SOTRs were formed through a one-step, gel-free method utilizing a  
249 polydimethylsiloxane (PDMS) mold and commercially available Petri dishes. SOTR  
250 formation required <2 days, much shorter than the previously reported tissue-ring formation  
251 time (~7–14 days)<sup>21,45</sup> due to multiple factors, including the use of gel-free medium, the low-  
252 attachment surface of the culture dish, and the ability of the CMs to aggregate into a 3D  
253 construct. This new methodology could be an important complement to current widely used

254 methods<sup>3,19,21,25</sup>, and the rapid formation of the ring organoid might be important for future  
255 mass production for drug-screening applications.

256         Given the large cell number required for SOTR formation in one well ( $4 \times 10^5$  cells),  
257 it remains difficult to achieve high-throughput assessment similar to those previously  
258 reported creating 200 tissue constructs per million cardiac cells<sup>46</sup>. Further optimizations are  
259 needed to scale down the PDMS mold and reduce the plated cell number. Additionally,  
260 because force generation is the primary function of CMs, force quantifications have been  
261 recently utilized to assess drug-related effects<sup>46,47</sup>; therefore, future mold design for SOTR  
262 formation might include a force transducer<sup>48</sup>, such as an elastic silicone pillar, capable of  
263 offering multiple parameters for more relevant assessment of drug response to pharmacologic  
264 agents. Furthermore, since the electrical pacing could be controlled with different loading  
265 level (by gradually increasing or decreasing frequency, or by tuning on/off region of  
266 stimulation over time)<sup>13,46</sup>, it would be useful to develop SOTR with controllable stimulation.  
267 SOTRs with controllable silicone pillar could be used to regulate the frequency of TWs in  
268 real-time.

269         It remains an open question as to what degree of CM maturation is necessary for  
270 regenerative applications<sup>49</sup>, such as injection into or engraftment onto an infarcted heart. The  
271 various maturation levels of SOTRs under different TW-training levels might offer  
272 preconditioned CMs for delivery into an infarcted myocardium, thereby allowing studies of  
273 how CM maturation affects therapeutic efficacy.

274         The key factors necessary for the sustained TWs were the closed-loop topology and  
275 the electric excitability of the enclosed cells. It could be that SOTRs with TWs can be created  
276 using other electrically active cells, such as neurons and retina cells. The looped TW might  
277 be useful for promoting the maturation of these cell types, which have previously been  
278 matured by electrical stimulation<sup>50-53</sup>. Moreover, because the frequency of the TWs within the

279 SOTRs can be adjusted by changing SOTR diameter, and given that the TWs could be  
280 sustained for >89 days, it might be possible to create pacemaker tissue with an adjustable  
281 beat rate for use as an *in vitro* model for drug assessment or potentially for *in vivo* heart  
282 pacing.

283 In conclusion, we found that TWs could be spontaneously generated and maintained  
284 within a SOTR comprising hiPSC-CMs, and that the TWs were able to make the CMs beat at  
285 a high frequency comparable to that found *in utero* during embryonic development.  
286 Moreover, the TWs promoted frequency dependent structural and functional maturation of  
287 the CMs, thereby offering a supplementary approach to electrical-stimulation-based  
288 maturation of electrically active cell types.

289

## 290 **Methods**

### 291 **Differentiation and culture of hiPSC-CMs**

292 GCaMP3-positive hiPSCs (253G1) were cultured<sup>54</sup> and differentiated<sup>55</sup> according to  
293 previously published methods<sup>54,56</sup>. All experiments involving the use of hiPSCs were  
294 performed following Kyoto University and Osaka University guidelines. After 30 to 50 days  
295 of differentiation, CM colonies floating in medium were collected and dissociated into a  
296 single-cell suspension by stirring for between 1 h and 2 h in protease solution [0.1%  
297 collagenase type I, 0.25% trypsin, 1 U/mL DNase I, 116 mM NaCl, 20 mM HEPES, 12.5  
298 mM NaH<sub>2</sub>PO<sub>4</sub>, 5.6 mM glucose, 5.4 mM KCl, and 0.8 mM MgSO<sub>4</sub> (pH 7.35)]<sup>56</sup>. The CM  
299 purity was characterized with Flow Cytometry and the CMs with high purity (> 85 %) were  
300 used for following experiments.

301

### 302 **Device manufacture**

303 PDMS (SYLGARD 184; Dow Corning, Midland, MI, USA) blocks were punched using a  
304 tissue puncher (Thermo Fisher Scientific, Waltham, MA, USA) to an inner diameter of 8 mm.  
305 After removal of the redundant central pillar, the remaining PDMS wells were collected, and  
306 PDMS wells and pillars with different diameters were centrally aligned and attached to the  
307 bottom of 24-well ultra-low attachment plates (Corning, Corning, NY, USA) as shown in  
308 Supplementary Fig. 1c. For micro-electrode array (MEA; Multi Channel Systems, Reutlingen,  
309 Germany) recording, the PDMS well and pillars were mounted to the MEA surface using  
310 silicone glue (Shin-Etsu Chemical, Tokyo, Japan) to fix the well and pillar to the bottom of  
311 the well. After drying and treatment with UV light for 30 min, the PDMS wells were ready  
312 for CM culture.

313

#### 314 **SOTR generation**

315 Before cell seeding, single CMs were filtered using a 40- $\mu$ m cell strainer (BD Falcon; Becton  
316 Dickenson, Franklin Lakes, NJ, USA) and resuspended at a density of  $2 \times 10^6$  cells/mL in  
317 serum-supplemented cardiac differentiation medium (Sigma-Aldrich, St. Louis, MO, USA)  
318 containing 20% fetal bovine serum (FBS; Gibco, Grand Island, NY, USA), 1% minimum  
319 essential medium non-essential amino acid solution (Sigma-Aldrich), 1% penicillin-  
320 streptomycin (Gibco), 2 mM L-glutamine (Sigma-Aldrich), 0.001% 2-mercaptoethanol  
321 (Gibco), and 0.005 N NaOH along with 10 ng/mL bone morphogenetic protein 4 (R&D  
322 Systems, Minneapolis, MN, USA).  $4 \times 10^5$  cells were plated in each PDMS culture well with  
323 3-mm pillar. For wells with other diameters, the cell number was fixed to  $4 \times 10^5$  or  
324 proportional to the diameter. After plating, CMs settled in the wells, aggregated, and  
325 congregated around the central pillar to form densely packed tissue rings within 2 days. The  
326 medium was changed to serum-free medium (cardiac differentiation medium without FBS)  
327 from day 2. After that, fresh medium was changed every 4 days. Before medium changing,

328 the fresh medium was pre-warmed to 37 degree. The dishes were placed on top of a pre-  
329 warmed metal block during medium changing. The medium was pipetted gently and slowly  
330 into the wells.

331

### 332 **Optical mapping and measurement**

333 Progression of tissue assembly was observed using a fluorescence microscope (Olympus  
334 IX71; Olympus, Tokyo, Japan) equipped with a charge-coupled device (CCD) camera  
335 (Exiblue; Qimaging, Surrey, BC, Canada; or DP74; Olympus). GCaMP3 was excited from  
336 450 nm to 490 nm, and fluorescence images of GCaMP3-positive CMs were recorded with  
337  $8 \times 8$  binning of CCD pixels at 30 frames/s. Images were processed to obtain data using  
338 ImageJ (NIH, Bethesda, MD, USA) and MATLAB (R2014b; MathWorks, Natick, MA, USA)  
339 using a customized program. Activation-time mapping was performed using a custom plug-in  
340 in ImageJ, as previously described<sup>57</sup>.

341

### 342 **Transient and electrophysiological Ca<sup>2+</sup> characterization**

343 Ca<sup>2+</sup> transience was recorded by fluorescence imaging of GCaMP3-positive CMs with the  
344 same experimental setup as that described for optical mapping and measurement. To  
345 characterize the spontaneous beating of SOTRs, TWs were removed from the SOTRs 1 day  
346 before recording by emerging the SOTRs into medium at room temperature for 1 min. The L-  
347 type Ca<sup>2+</sup>-channel blocker verapamil (1 mM; Sigma-Aldrich) and 5 mM caffeine (Wako Pure  
348 Chemical Industries, Ltd. Osaka, Japan) were added directly to the chamber containing the  
349 SOTRs during imaging, as described in the figure legends.

350 Extracellular recording of field potentials (FPs) was performed using an MEA data-  
351 acquisition system (USB-ME64; Multi Channel Systems). Signals were recorded from days 5  
352 and 6 after CM seeding, and data were collected and processed using MC\_Rack (Multi

353 Channel Systems) or LabChart (ADInstruments, Dunedin, New Zealand). The amplitude, QT  
354 interval, and beat rate were determined by analyzing the wave form of the FP.

355

### 356 **Histology**

357 SOTRs were rinsed three times with phosphate-buffered saline (PBS), fixed in 4%  
358 paraformaldehyde (PFA) in PBS for 30 min, and embedded in paraffin. Thin sections were  
359 sliced and stained with HE (Muto Chemical Corporation, Tokyo, Japan), and observation was  
360 carried out using a CKX41 microscope (Olympus).

361

### 362 **Immunostaining and imaging**

363 SOTRs were fixed in 4% PFA at room temperature for 30 min, permeabilized with 0.5% (v/v)  
364 Triton X-100 in Dulbecco's (D)-PBS at room temperature for 1 h, and incubated in blocking  
365 solution [0.1% (v/v) Tween-20, 5% (v/v) normal donkey serum, 3% (v/v) bovine serum  
366 albumin, and 5% (v/v) normal goat serum in D-PBS] at 4°C for 16 h. SOTRs were then  
367 incubated with the primary antibodies anti-troponin T2 (TnT2; mouse monoclonal IgG; 1:200;  
368 SC-20025; Santa Cruz Biotechnology, Dallas, TX, USA), anti- $\alpha$ -actinin (mouse monoclonal  
369 IgG, 1:1000; A7811; Sigma-Aldrich), or anti- $\beta$ -MHC (mouse MYH7 monoclonal IgM, 1:100;  
370 SC-53089; Santa Cruz Biotechnology) at 4°C overnight. SOTRs were then rinsed with PBS  
371 and incubated with secondary antibodies diluted 1:300 in blocking buffer (Alexa Fluor 594  
372 anti-mouse IgG; 715-586-150; and DyLight-594 anti-mouse IgM; 715-516-020; Jackson  
373 ImmnoResearch, West Grove, PA, USA) at room temperature for 1 h. 4'-6-Diamidino-2-  
374 phenylindole (DAPI; 300 nM; Wako Pure Chemical Industries, Ltd.) was used to counterstain  
375 nuclei at room temperature for 30 min, after which images were captured using a confocal  
376 microscope (FV1200; Olympus). CM orientation within SOTRs was determined using the  
377 Fourier component analysis plugin "Directionality" in ImageJ<sup>47</sup> (NIH) that calculated the

378 orientation distribution for the red color channel. Fluorescence quantification of  $\beta$ -MHC was  
379 performed by calculating the gray value averaged over the area in all sample groups, with all  
380 the fluorescence values were normalized to that of zero TW group.

381

### 382 **Transmission electron microscopy (TEM)**

383 SOTRs were washed with 0.1 M Sorenson's buffer (pH 7.4) twice and fixed with 2.5%  
384 glutaraldehyde (Sigma-Aldrich) in 0.1 M Sorenson's buffer (pH 7.4), after which samples  
385 were post-fixed with 1% OsO<sub>4</sub> in Sorrenson's buffer. The samples were then embedded,  
386 sliced, and stained with lead citrate and examined under a JEOL1010 transmission electron  
387 microscope (JEOL Ltd., Tokyo, Japan).

388

### 389 **Mitochondrial respiration assay**

390 Mitochondrial function was analyzed using a Seahorse XF96 extracellular flux analyzer  
391 (Agilent Technologies, Carlsbad, CA, USA). After a 14-day culture, SOTRs were dissociated  
392 into a single-cell suspension by stirring for 30 min in protease solution, followed by cell  
393 seeding onto a cell-culture microplate (Agilent Technologies) at a density of 20,000 cells per  
394 XF96 well. OCR assays were performed 3 days after seeding, and culture medium was  
395 changed to the base medium (Seahorse XF assay media supplemented with 1 mM sodium  
396 pyruvate; Life Technologies, Carlsbad, CA, USA). Substrates and inhibitors were injected  
397 during measurements at a final concentrations of 3.5  $\mu$ M 4-(trifluoromethoxy)  
398 phenylhydrazone (FCCP; Seahorse Bioscience, Billerica, MA, USA), 1  $\mu$ M oligomycin, 0.5  
399  $\mu$ M antimycin, and 0.5  $\mu$ M rotenone for the MitoStress assay.

400

### 401 **Flow Cytometry**



402 Before used for generating SOTRs, hiPSCs-CMs fixed in 4% PFA at room temperature for  
403 30 min, permeabilized with 0.5% v/v Triton X-100 in Dulbecco's (D)-PBS at room  
404 temperature for 30 min, incubated with anti-cTnT antibodies (mouse monoclonal IgG, 1:200;  
405 Santa Cruz Biotechnology: SC-20025) or isotype-matched antibodies (BD Phosphoflow:  
406 557782 ) at 37 °C for 30 min, washed with D-PBS, and then incubated with Alexa Fluor 488  
407 anti-mouse IgG (1:500; Jackson ImmnoResearch: 715-546-150). Cells were then washed  
408 twice with D-PBS and analyzed using a FACS Canto II flow cytometer (BD Biosciences,  
409 USA) and the FlowJo software (Treestar Inc., USA). Data shown are representative of  
410 five independent experiments.

411

#### 412 **Contractility analysis**

413 SOTR contractility was measured using a micron-scale mechanical-testing system  
414 (MicroSquisher; CellScale Biomaterials Testing, Waterloo, ON, Canada). TWs were stopped  
415 by exchanging medium at room temperature 1 day before measurement, and the SOTR was  
416 removed from the pillar and fixed on a stage. A cantilever beam with a diameter of 0.30 mm  
417 was pressed onto the SOTR, with the force calculated by cantilever-beam deflection in  
418 response to differential displacement. All samples were tested at 37°C.

419

#### 420 **qPCR**

421 Total RNA in SOTRs was harvested using Trizol reagent (Life Technologies) according to  
422 manufacturer instructions, and RNA concentration was determined using a NanoDrop1000  
423 spectrophotometer (Thermo Fisher Scientific). cDNA was synthesized with a first-strand  
424 synthesis kit (TaKaRa, Shiga, Japan) and analyzed by qPCR using SYBR Green PCR master  
425 mix (Life Technologies) and the qBiomarker validation PCR array (IPHS-102A; Qiagen,  
426 Hilden, Germany) in a 96-well format according to manufacturer instructions. Cycling

427 conditions were set as follows: initial denaturation at 95°C for 10 min, followed by 40 cycles  
428 at 95°C for 15 s and 60°C for 70s. Reactions were performed in a StepOnePlus real-time PCR  
429 system (Life Technologies). Gene expression was determined using the  $2^{-\Delta\Delta C_t}$  method and  
430 relative to *glyceraldehyde 3-phosphate dehydrogenase* expression. Heatmaps were created by  
431 the “pheatmap” package (<https://cran.r-project.org/web/packages/pheatmap/index.html>), and  
432 clustering order was produced using the Ward.D clustering algorithm ([https://stat.ethz.ch/R-](https://stat.ethz.ch/R-manual/R-devel/library/stats/html/hclust.html)  
433 [manual/R-devel/library/stats/html/hclust.html](https://stat.ethz.ch/R-manual/R-devel/library/stats/html/hclust.html)).

434

### 435 **RNA quantification and qualification for RNA sequencing**

436 RNA degradation and contamination was monitored on 1% agarose gels. RNA purity was  
437 determined using a NanoPhotometer spectrophotometer (Implen, Westlake Village, CA,  
438 USA). RNA concentration was measured using a Qubit RNA assay kit in a Qubit 2.0  
439 fluorometer (Life Technologies). RNA integrity was assessed using the RNA Nano 6000  
440 assay kit and the Agilent Bioanalyzer 2100 system (Agilent Technologies).

441

### 442 **Library preparation for RNA sequencing**

443 A total of 1.5 µg RNA per sample was used as input material for RNA sample preparations.  
444 Sequencing libraries were generated using a NEBNext Ultra™ RNA library prep kit  
445 Illumina (New England Biolabs, Ipswich, MA, USA) according to manufacturer instructions,  
446 and index codes were added to attribute sequences to each sample. Briefly, mRNA was  
447 purified from total RNA using poly-T oligo-attached magnetic beads, and fragmentation was  
448 performed using divalent cations under an elevated temperature in NEBNext First Strand  
449 Synthesis reaction buffer (5×; New England Biolabs). First-strand cDNA was synthesized  
450 using a random hexamer primer and M-MuLV reverse transcriptase (RNase H<sup>-</sup>; New  
451 England Biolabs). Second-strand cDNA synthesis was subsequently performed using DNA

452 polymerase I and RNase H. Remaining overhangs were converted into blunt ends via  
453 exonuclease/polymerase activities. After adenylation of the 3' ends of the DNA fragments,  
454 NEBNext Adaptor (New England Biolabs) with a hairpin loop structure was ligated to  
455 prepare for hybridization. To select cDNA fragments of the correct length, the library  
456 fragments were purified using the AMPure XP system (Beckman Coulter, Beverly, MA,  
457 USA), after which 3  $\mu$ L USER enzyme (New England Biolabs) was incubated with size-  
458 selected, adaptor-ligated cDNA at 37°C for 15 min, followed by 5 min at 95°C. PCR was  
459 performed using a Phusion high-fidelity DNA polymerase, universal PCR primers, and an  
460 Index (X) primer (New England Biolabs). Products were purified (AMPure XP; Beckman  
461 Coulter), and library quality was assessed using the Agilent Bioanalyzer 2100 system  
462 (Agilent Technologies).

463

#### 464 **Clustering and sequencing**

465 Clustering of the Index-coded samples was performed on a cBot cluster generation system  
466 using a HiSeq 4000 PE cluster kit (Illumina, San Diego, CA, USA) according to manufacturer  
467 instructions. After cluster generation, the library preparations were sequenced on an Illumina  
468 HiSeq 4000 platform (Illumina), and 150-bp paired-end reads were generated.

469 After quality control, the paired-end reads were aligned to the hg19 human reference  
470 genome (UCSC; <https://genome.ucsc.edu/>) using TopHat (v2.0.12;  
471 <https://ccb.jhu.edu/software/tophat/index.shtml>)<sup>48</sup>. We quantified the relative expression level  
472 as  $\log_2(\text{FPKM} + 1)$  to perform PCA analysis and hierarchical clustering. Uniquely mapped  
473 reads counted by HTSeq<sup>49</sup> were used to conduct differential-expression analysis in DESeq2<sup>50</sup>.  
474 A total of 349 gens ( $p < 0.05$ , fold change  $> 1.5$ ) were selected for the GO analysis. We plotted  
475 heatmaps using the “pheatmap” package in R (<https://cran.r->

476 [project.org/web/packages/pheatmap/index.html](http://project.org/web/packages/pheatmap/index.html)) and performed GO enrichment analysis  
477 using Metascape<sup>58</sup> (<http://metascape.org/>).

478

#### 479 **Statistical analysis**

480 All quantitative data are presented as the mean  $\pm$  standard deviation of the mean (mean  $\pm$  s.d.).

481 The differences between experimental groups were analyzed by Student's *t* test (between two

482 groups) or one-way analysis of variance, followed by Tukey's post hoc test (among three

483 groups). A  $P < 0.05$  was considered statistically significant.

484

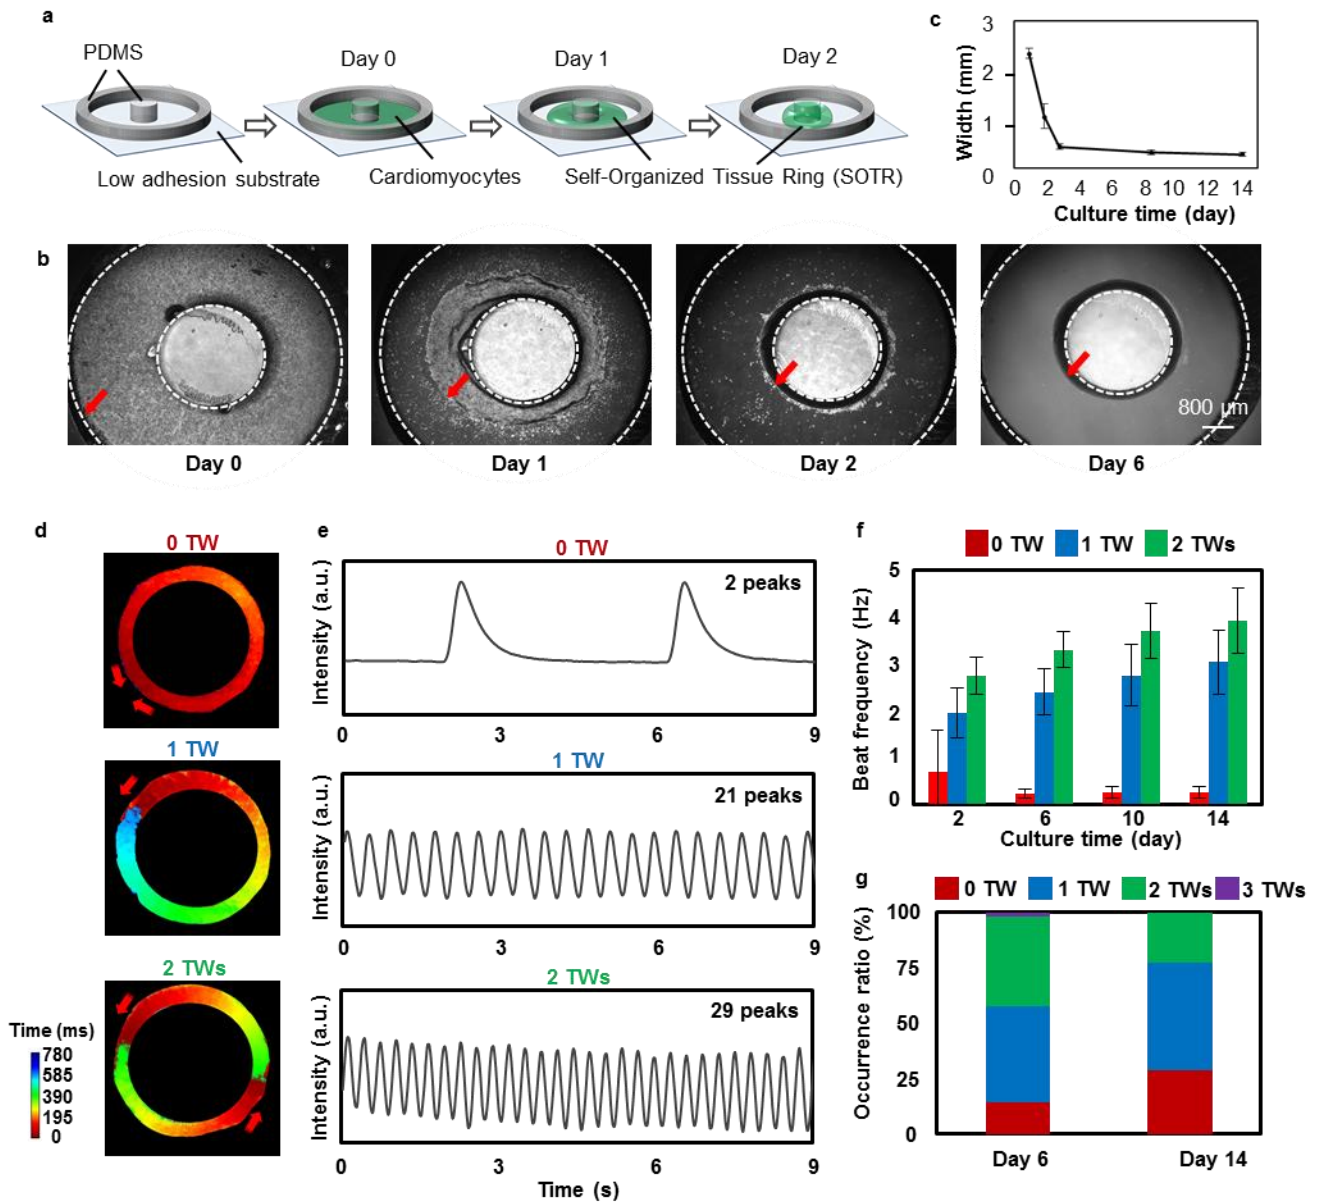

485 **Figure 1. TWs promoted rapid beating of cells in SOTRs.** (a) Schematic describing SOTR  
 486 formation. (b) Bright-field images of hiPSC-CMs in the template. The red arrows indicate the  
 487 edge of cardiac tissues in the template, and the dashed lines indicated the PDMS block and  
 488 pillar boundaries, respectively. Pillar diameter = 3mm. (c) Quantification of the width of the  
 489 SOTRs on the indicated culture day (mean  $\pm$  s.d.;  $n = 4$ ). (d) Activation map of GCaMP3-  
 490 positive SOTRs with zero, one, or two TWs. The red arrows indicate the propagation  
 491 direction of the action potential. (e) GCaMP3-fluorescence signal at a fixed position on the  
 492 ring of SOTRs with zero, one, or two TWs on day 6. (f) Beat rates of SOTRs at different

493 culture times (mean  $\pm$  s.d.; 2 TWs:  $n = 10$ ; 1 TW:  $n = 12$ ; 0 TWs:  $n = 8$ ). (g) The percentage  
 494 of occurrence for different numbers of TWs on days 6 ( $n = 204$ ) and 14 ( $n = 186$ ),  
 495 respectively.

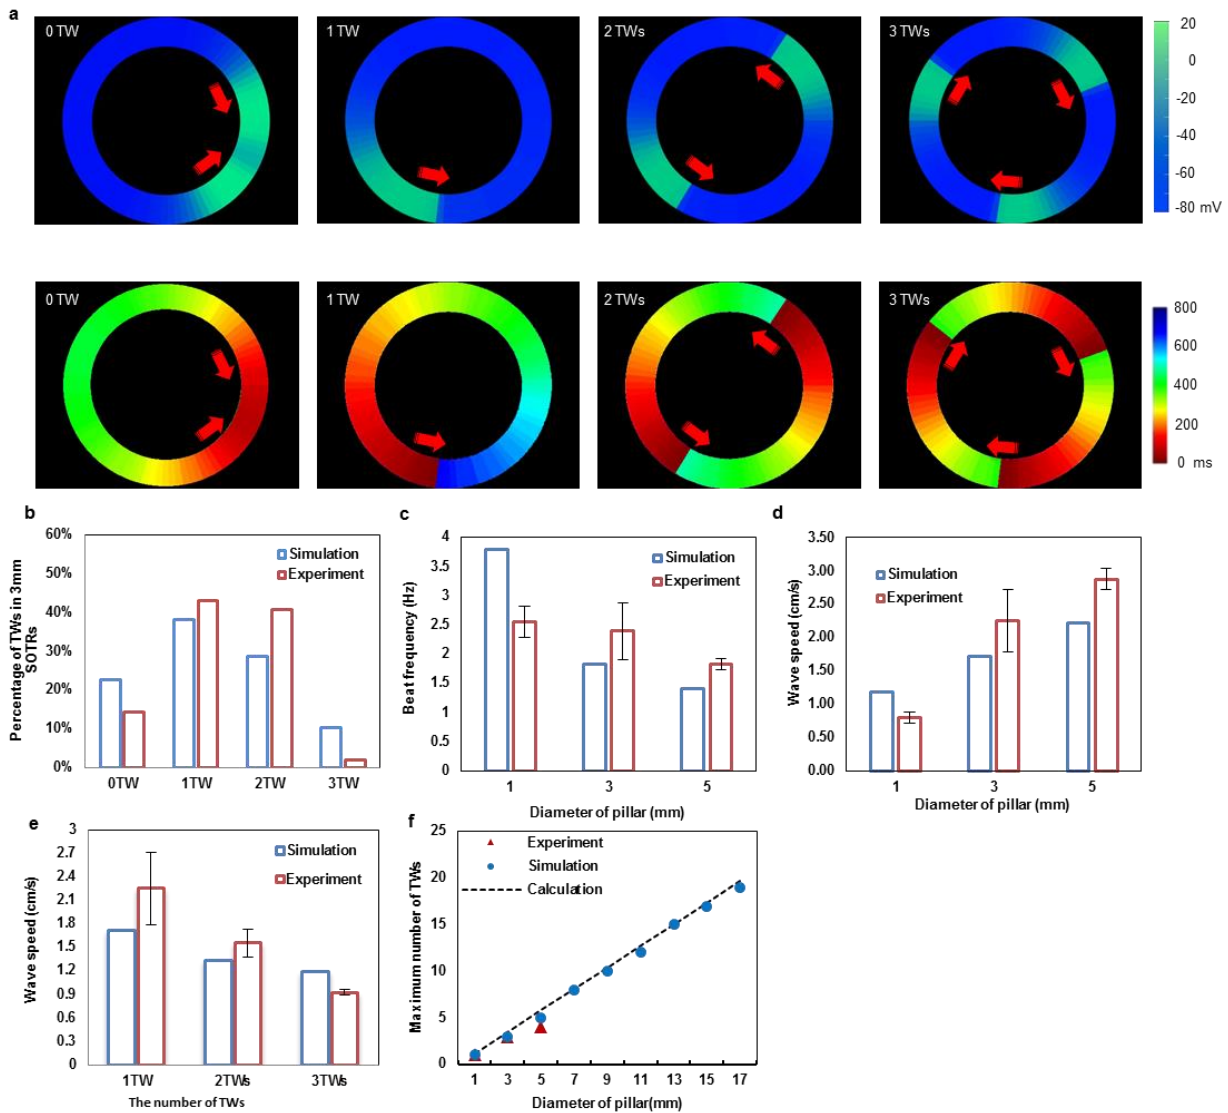

496

497 **Figure 2. Accurate reproduction of TW features in SOTRs using a mathematical model.**

498 (a) Examples of simulation results of the model (upper panel) and the activation map (lower  
 499 panel). For the group with zero TWs, an action potential initiates from the left position of the  
 500 ring and propagates in the opposite directions along the ring, after which the two waves meet  
 501 and annihilate on another. The process will start again with new waves initiating at the same  
 502 position periodically. For groups with one, two, or three TWs, stable TWs travel around the

503 ring. Membrane potential and activation time are color coded. (b) The percentage of stable  
504 TWs in SOTRs at day 6 (diameter = 3 mm;  $n = 60$  in the simulation and  $n = 204$  in the  
505 experiment). (c) Beat rate (Hz) of CMs in SOTRs with one TW at day 6 for different pillar  
506 diameters [experiment: 1-mm SOTR ( $n = 4$ ); 3-mm SOTR ( $n = 12$ ); 5-mm SOTR ( $n = 10$ )].  
507 (d) Similar information shown in (c) but with TW speed. (e) Speeds of one, two, or three  
508 TWs in SOTRs with a pillar diameter of 3 mm [experiment: mean  $\pm$  s.d.; 3 TWs ( $n = 4$ ); 2  
509 TWs ( $n = 10$ ); 1 TW ( $n = 12$ )]. (f) The maximum number of TWs in SOTRs with different  
510 pillar diameters.  
511

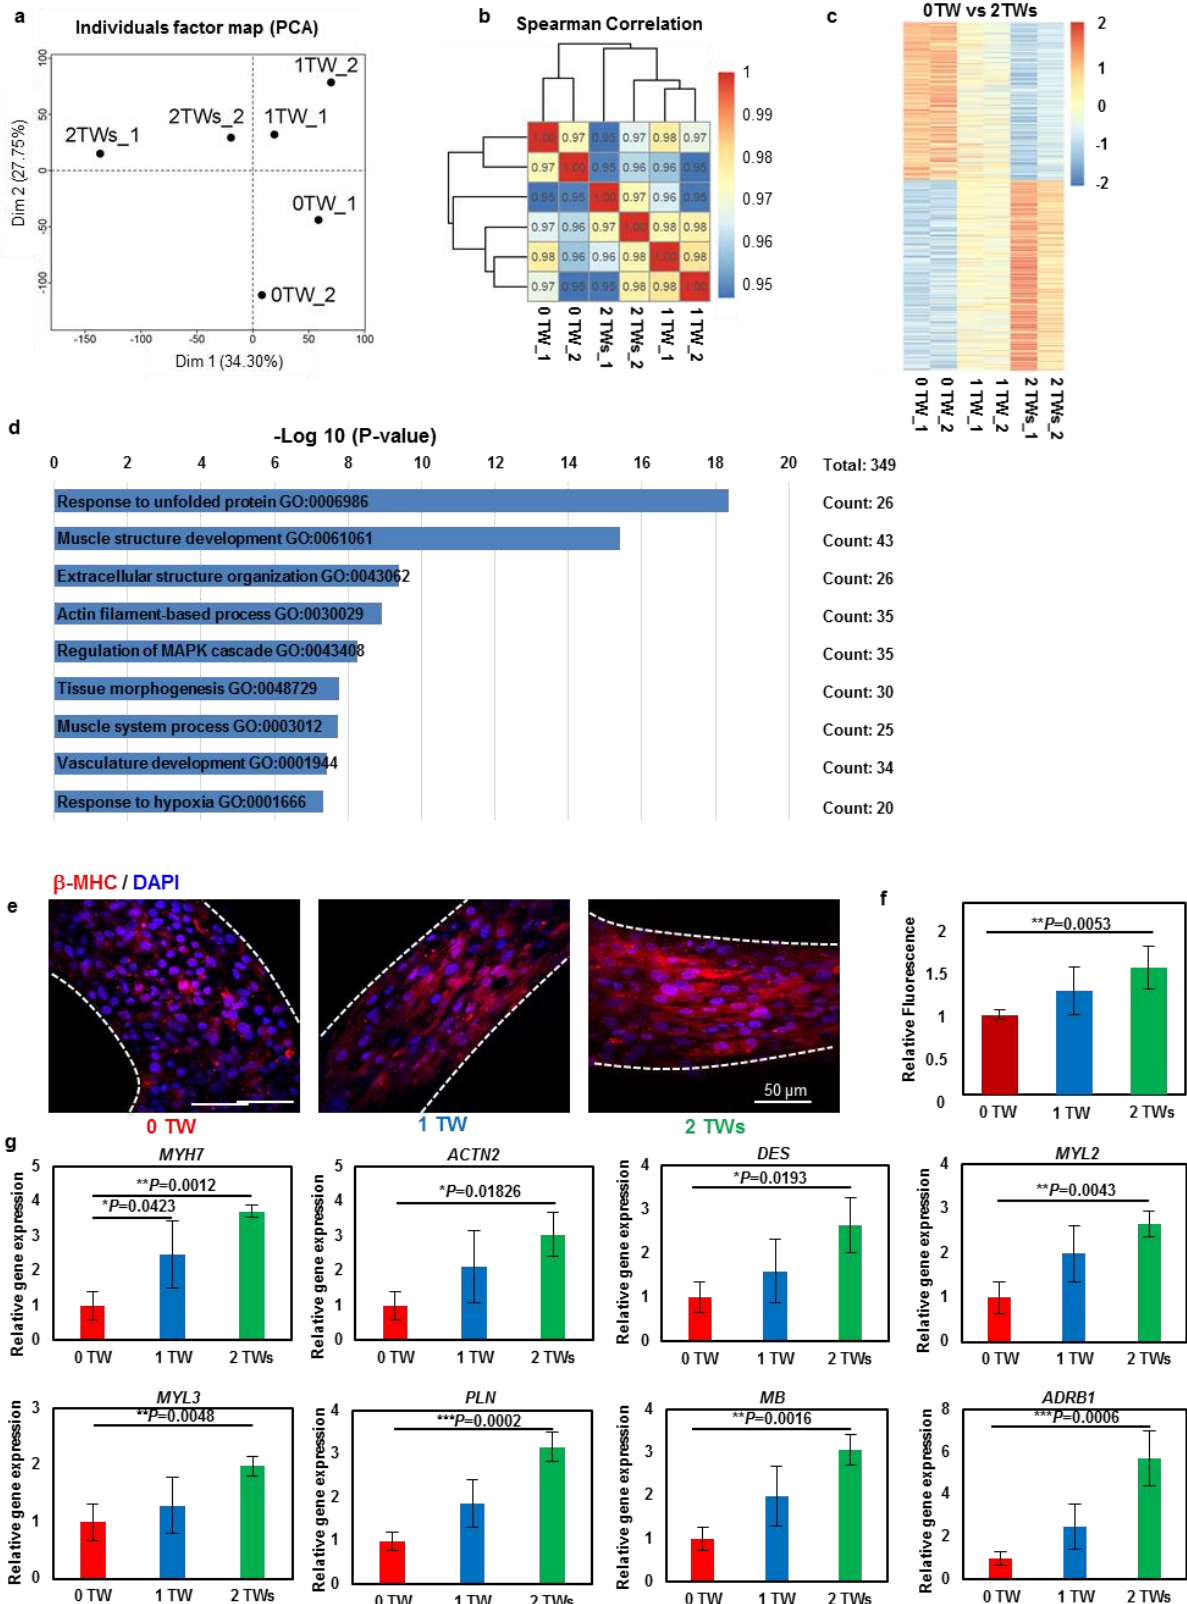

512

513 **Figure 3. TWs upregulate cardiac-specific gene expression.** (a) PCA of SOTRs with or

514 without TWs based on RNA-sequencing data. (b) Heatmap showing hierarchical clustering of



515 the correlation matrix resulting from comparison of expression values for each sample.  
516 Correlations calculated using Spearman correlation. (c) Heatmap showing the relative  
517 expression levels (z-score) of 349 genes from SOTRs with TWs (1 and 2 TWs) as compared  
518 with SOTRs with zero TWs. (d) GO categories significantly enriched for genes upregulated  
519 in SOTRs with two TWs as compared with SOTRs with zero TWs. Genes with fold  
520 changes  $> 1.5$  and a  $P < 0.05$  were analyzed. Enriched terms are listed. (e) Representative  
521 confocal images of SOTRs with zero, one, or two TWs on day 14. CMs were stained with  
522 anti- $\beta$ -MHC (red) and DAPI (blue). (f) Quantification of  $\beta$ -MHC levels in SOTRs on day 14.  
523 Total integrated fluorescence of  $\beta$ -MHC was normalized to that of SOTRs with zero TWs  
524 (mean  $\pm$  s.d.;  $n = 4$ ).  $**P < 0.01$ . (g) The expression of cardiac-specific genes in SOTRs 14  
525 days after cell seeding (mean  $\pm$  s.d.;  $n = 4$ ).  $*P < 0.05$ ;  $**P < 0.01$ ;  $***P < 0.001$ .  
526

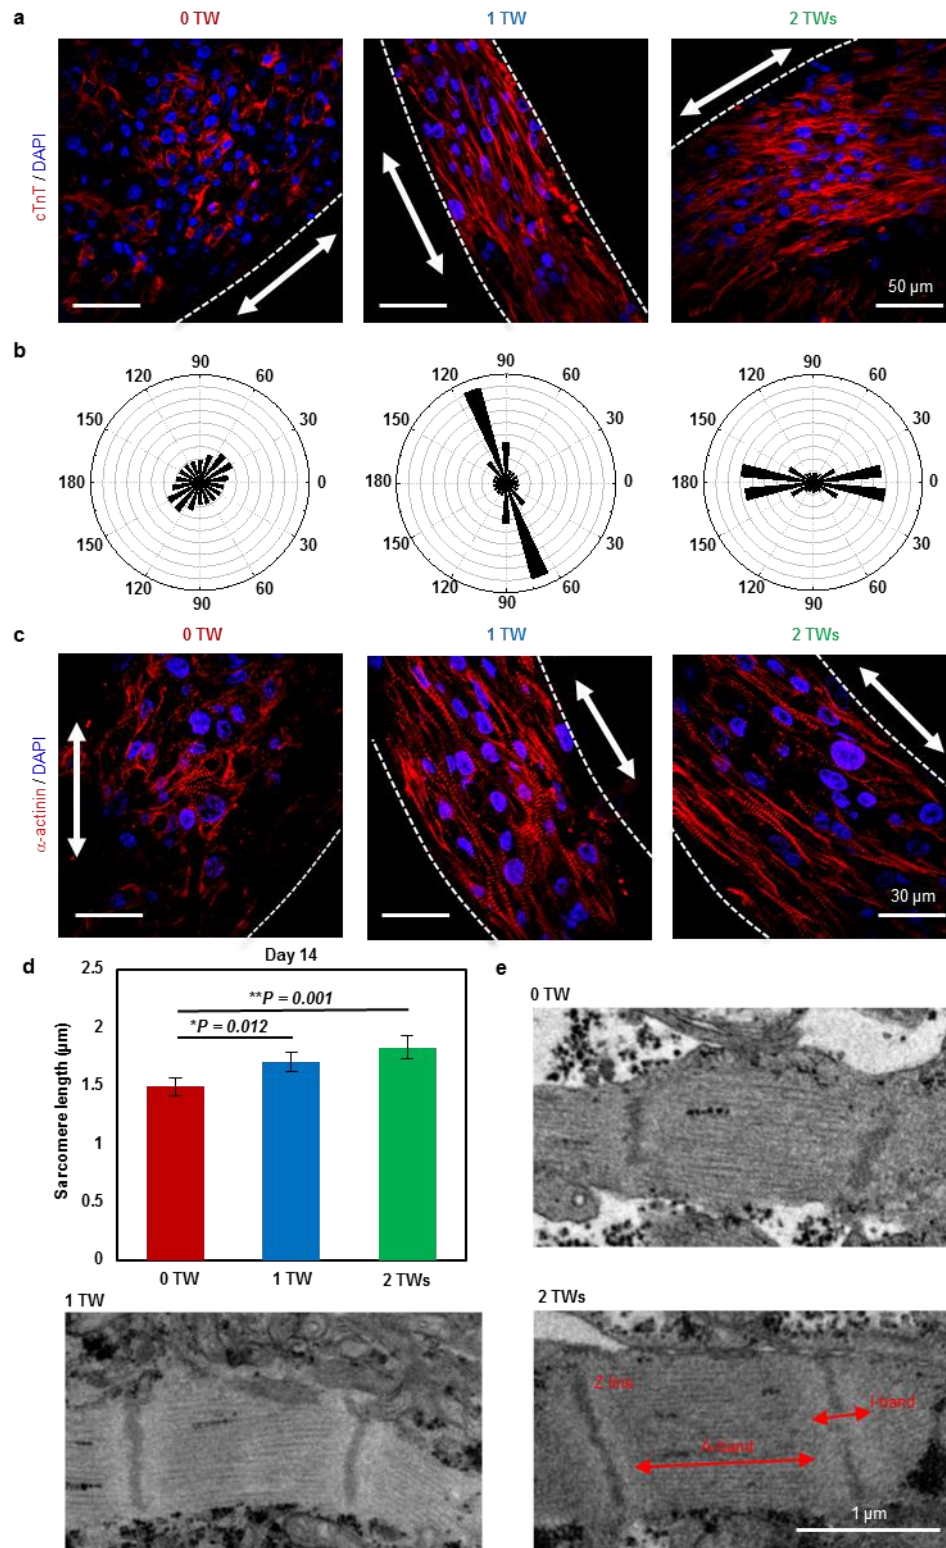

527

528 **Figure 4. TWs promote CM alignment.** (a) Representative confocal images of SOTRs with  
529 zero, one, or two TWs. CMs were stained with anti-TnT2 (red) and DAPI (blue), revealing  
530 CM alignment in TW samples. Arrows mark the ring orientation. (b) Angular graph based on

531 Fourier component analysis of TnT2 orientation distribution. (c) Representative confocal  
532 images of stained SOTRs with different TWs (red:  $\alpha$ -actinin; blue: DAPI). Arrows mark the  
533 ring orientation. (d) Sarcomere lengths of CMs within SOTRs on day 14 [mean  $\pm$  s.d.; 0  
534 TWs ( $n = 5$ ); 1 TW ( $n = 5$ ); 2 TWs ( $n = 4$ )].  $*P < 0.05$ ;  $**P < 0.01$ . (e) TEM analysis of  
535 SOTRs on day 14.  
536

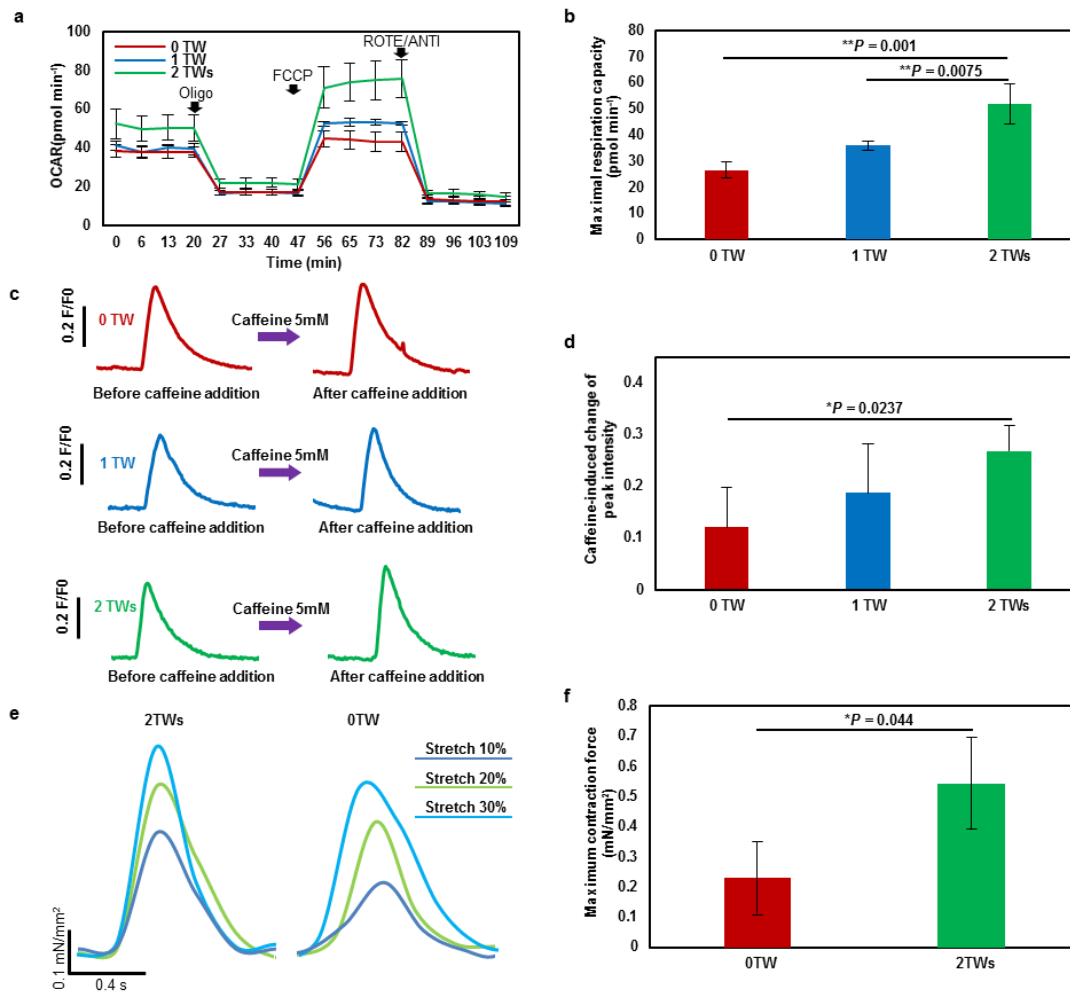

537

538 **Figure 5. TWs improve Ca<sup>2+</sup>-handling properties.** (a) Results of OCR assays. Olig,  
539 oligomycin; FCCCP, carbonyl cyanide-4-(trifluoromethoxy) phenylhydrazine; ROTE/ANTI,  
540 rotenone and antimycin A. (b) Quantification of maximal respiration capacity (mean  $\pm$  s.d.;  $n$   
541 = 4).  $**P < 0.01$ . (c) Representative traces of Ca<sup>2+</sup> transient following administration of 5  
542 mM caffeine to CMs in SOTRs with zero TWs, one TW, and two TWs at day 7. SOTRs were  
543 immersed in room temperature medium to stop TWs on day 6. (d) Caffeine-induced change  
544 in peak intensity in different groups (mean  $\pm$  s.d.;  $n = 6$ ).  $*P < 0.05$ . (e) Force traces of  
545 SOTRs during progressive stretching. (f) Maximum contractile force of SOTRs (mean  $\pm$  s.d.;  
546  $n = 3$ ).  $*P < 0.05$ .

547

548 **Reference**

- 549 1 Karakikes, I., Ameen, M., Termglinchan, V. & Wu, J. C. Human Induced Pluripotent Stem Cell–  
550 Derived Cardiomyocytes Insights Into Molecular, Cellular, and Functional Phenotypes.  
551 *Circulation Research*. **117**, 80-88 (2015).
- 552 2 Dolnikov, K. *et al.* Functional properties of human embryonic stem cell–derived  
553 cardiomyocytes: intracellular Ca<sup>2+</sup> handling and the role of sarcoplasmic reticulum in the  
554 contraction. *Stem cells*. **24**, 236-245 (2006).
- 555 3 Nunes, S. S. *et al.* Biowire: a platform for maturation of human pluripotent stem cell-derived  
556 cardiomyocytes. *Nat. Methods*. **10**, 781-787 (2013).
- 557 4 Davis, R. P. *et al.* Cardiomyocytes derived from pluripotent stem cells recapitulate  
558 electrophysiological characteristics of an overlap syndrome of cardiac sodium channel  
559 disease. *Circulation*. **125**, 3079-3091 (2012).
- 560 5 Jackman, C. P., Carlson, A. L. & Bursac, N. Dynamic culture yields engineered myocardium  
561 with near-adult functional output. *Biomaterials*. **111**, 66-79 (2016).
- 562 6 Ulmer, B. M. *et al.* Contractile Work Contributes to Maturation of Energy Metabolism in  
563 hiPSC-Derived Cardiomyocytes. *Stem cell reports*. **10**, 834-847 (2018).
- 564 7 Shadrin, I. Y. *et al.* Cardiopatch platform enables maturation and scale-up of human  
565 pluripotent stem cell-derived engineered heart tissues. *Nature communications*. **8**, 1825  
566 (2017).
- 567 8 Gao, L. *et al.* Myocardial Tissue Engineering With Cells Derived From Human-Induced  
568 Pluripotent Stem Cells and a Native-Like, High-Resolution, 3-Dimensionally Printed Scaffold.  
569 *Circulation Research*. **120**, 1318-1325 (2017).
- 570 9 Parikh Shan, S. *et al.* Thyroid and Glucocorticoid Hormones Promote Functional T-Tubule  
571 Development in Human-Induced Pluripotent Stem Cell–Derived Cardiomyocytes. *Circulation*  
572 *Research*. **121**, 1323-1330 (2017).
- 573 10 Herron, T. J. *et al.* Extracellular matrix–mediated maturation of human pluripotent stem  
574 cell–derived cardiac monolayer structure and electrophysiological function. *Circulation:*  
575 *Arrhythmia and Electrophysiology*. **9**, e003638 (2016).
- 576 11 Brevet, A., Pinto, E., Peacock, J. & Stockdale, F. E. Myosin synthesis increased by electrical  
577 stimulation of skeletal muscle cell cultures. *Science*. **193**, 1152-1154 (1976).
- 578 12 McDonough, P. M. & Glembotski, C. Induction of atrial natriuretic factor and myosin light  
579 chain-2 gene expression in cultured ventricular myocytes by electrical stimulation of  
580 contraction. *J. Biol. Chem*. **267**, 11665-11668 (1992).
- 581 13 Ronaldson-Bouchard, K. *et al.* Advanced maturation of human cardiac tissue grown from  
582 pluripotent stem cells. *Nature*. **556**, 239-243 (2018).
- 583 14 Nunes, S. S. *et al.* Biowire: a platform for maturation of human pluripotent stem cell-derived  
584 cardiomyocytes. *Nat Methods*. **10**, 781-787 (2013).
- 585 15 Eng, G. *et al.* Autonomous beating rate adaptation in human stem cell-derived  
586 cardiomyocytes. *Nature communications*. **7** (2016).
- 587 16 Tandon, N. *et al.* Electrical stimulation systems for cardiac tissue engineering. *Nature*  
588 *protocols*. **4**, 155-173 (2009).
- 589 17 Merrill, D. R., Bikson, M. & Jefferys, J. G. R. Electrical stimulation of excitable tissue: design of  
590 efficacious and safe protocols. *J. Neurosci. Methods*. **141**, 171-198 (2005).
- 591 18 Hirt, M. N. *et al.* Functional improvement and maturation of rat and human engineered  
592 heart tissue by chronic electrical stimulation. *Journal of molecular and cellular cardiology*. **74**,  
593 151-161 (2014).
- 594 19 Godier-Furnémont, A. F. *et al.* Physiologic force-frequency response in engineered heart  
595 muscle by electromechanical stimulation. *Biomaterials*. **60**, 82-91 (2015).

- 596 20 van Meer, B. J., Tertoolen, L. G. & Mummery, C. L. Measuring physiological responses of  
597 human pluripotent stem cell derived cardiomyocytes to drugs and disease. *STEM CELLS*. **34**,  
598 2008-2015 (2016).
- 599 21 Zimmermann, W.-H. *et al.* Tissue engineering of a differentiated cardiac muscle construct.  
600 *Circulation research*. **90**, 223-230 (2002).
- 601 22 Dhein, S. *et al.* Mechanical control of cell biology. Effects of cyclic mechanical stretch on  
602 cardiomyocyte cellular organization. *Progress in biophysics and molecular biology*. **115**, 93-  
603 102 (2014).
- 604 23 Li, Y. *et al.* Chinese-Noodle-Inspired Muscle Myofiber Fabrication. *Advanced Functional*  
605 *Materials*. **25**, 5999-6008 (2015).
- 606 24 Tulloch, N. L. *et al.* Growth of engineered human myocardium with mechanical loading and  
607 vascular coculture. *Circulation research*. **109**, 47-59 (2011).
- 608 25 Mihic, A. *et al.* The effect of cyclic stretch on maturation and 3D tissue formation of human  
609 embryonic stem cell-derived cardiomyocytes. *Biomaterials*. **35**, 2798-2808 (2014).
- 610 26 Shaheen, N. *et al.* Human Induced Pluripotent Stem Cell-Derived Cardiac Cell Sheets  
611 Expressing Genetically Encoded Voltage Indicator for Pharmacological and Arrhythmia  
612 Studies. *Stem cell reports*. **10**, 1879-1894 (2018).
- 613 27 Kadota, S. *et al.* Development of a reentrant arrhythmia model in human pluripotent stem  
614 cell-derived cardiac cell sheets. *European heart journal*. **34**, 1147-1156 (2012).
- 615 28 González, H., Nagai, Y., Bub, G., Glass, L. & Shrier, A. Reentrant waves in a ring of embryonic  
616 chick ventricular cells imaged with a Ca<sup>2+</sup> sensitive dye. *BioSyst*. **71**, 71-80 (2003).
- 617 29 Kawatou, M. *et al.* Modelling Torsade de Pointes arrhythmias in vitro in 3D human iPS cell-  
618 engineered heart tissue. *Nature communications*. **8**, 1078 (2017).
- 619 30 Smeets, J. L., Allesie, M. A., Lammers, W. J., Bonke, F. I. & Hollen, J. The wavelength of the  
620 cardiac impulse and reentrant arrhythmias in isolated rabbit atrium. The role of heart rate,  
621 autonomic transmitters, temperature, and potassium. *Circulation research*. **58**, 96-108  
622 (1986).
- 623 31 Izumi-Nakaseko, H. *et al.* Characterization of human iPS cell-derived cardiomyocyte sheets as  
624 a model to detect drug-induced conduction disturbance. *The Journal of toxicological sciences*.  
625 **42**, 183-192 (2017).
- 626 32 Rensma, P. L., Allesie, M. A., Lammers, W. J., Bonke, F. I. & Schalij, M. J. Length of excitation  
627 wave and susceptibility to reentrant atrial arrhythmias in normal conscious dogs. *Circulation*  
628 *research*. **62**, 395-410 (1988).
- 629 33 Courtemanche, M., Keener, J. P. & Glass, L. A delay equation representation of pulse  
630 circulation on a ring in excitable media. *SIAM Journal on Applied Mathematics*. **56**, 119-142  
631 (1996).
- 632 34 Courtemanche, M., Glass, L. & Keener, J. P. Instabilities of a propagating pulse in a ring of  
633 excitable media. *Physical Review Letters*. **70**, 2182 (1993).
- 634 35 Shaw, R. M. & Rudy, Y. Ionic mechanisms of propagation in cardiac tissue: roles of the  
635 sodium and L-type calcium currents during reduced excitability and decreased gap junction  
636 coupling. *Circulation research*. **81**, 727-741 (1997).
- 637 36 Beauchamp, P. *et al.* Electrical propagation in synthetic ventricular myocyte strands from  
638 germline connexin43 knockout mice. *Circulation research*. **95**, 170-178 (2004).
- 639 37 Arduini, D., Rizzo, G. & Romanini, C. *Fetal cardiac function*. (Parthenon Pub. Group, 1995).
- 640 38 Groenendyk, J., Agellon, L. B. & Michalak, M. Coping with endoplasmic reticulum stress in  
641 the cardiovascular system. *Annu. Rev. Physiol.* **75**, 49-67 (2013).
- 642 39 van der Velden, J., de Jong, J. W., Owen, V., Burton, P. & Stienen, G. Effect of protein kinase  
643 A on calcium sensitivity of force and its sarcomere length dependence in human  
644 cardiomyocytes. *Cardiovascular research*. **46**, 487-495 (2000).
- 645 40 Asnes, C. F., Marquez, J. P., Elson, E. L. & Wakatsuki, T. Reconstitution of the Frank-Starling  
646 mechanism in engineered heart tissues. *Biophys. J.* **91**, 1800-1810 (2006).

- 647 41 Stoppel, W. L., Kaplan, D. L. & Black Iii, L. D. Electrical and mechanical stimulation of cardiac  
648 cells and tissue constructs. *Advanced Drug Delivery Reviews*. **96**, 135-155 (2016).
- 649 42 Lindsley, D. B. Heart and brain potentials of human fetuses in utero. *The American Journal of*  
650 *Psychology*. **55**, 412-416 (1942).
- 651 43 DuBose, T. J., Cunyus, J. A. & Johnson, L. F. Embryonic heart rate and age. *Journal of*  
652 *Diagnostic Medical Sonography*. **6**, 151-157 (1990).
- 653 44 Zhang, D. *et al.* Tissue-engineered cardiac patch for advanced functional maturation of  
654 human ESC-derived cardiomyocytes. *Biomaterials*. **34**, 5813-5820 (2013).
- 655 45 Gwyther, T. A. *et al.* Engineered vascular tissue fabricated from aggregated smooth muscle  
656 cells. *Cells Tissues Organs*. **194**, 13-24 (2011).
- 657 46 Boudou, T. *et al.* A microfabricated platform to measure and manipulate the mechanics of  
658 engineered cardiac microtissues. *Tissue Engineering Part A*. **18**, 910-919 (2011).
- 659 47 Agarwal, A., Goss, J. A., Cho, A., McCain, M. L. & Parker, K. K. Microfluidic heart on a chip for  
660 higher throughput pharmacological studies. *Lab on a Chip*. **13**, 3599-3608 (2013).
- 661 48 Marquez, J. P. *et al.* High-throughput measurements of hydrogel tissue construct mechanics.  
662 *Tissue Engineering Part C: Methods*. **15**, 181-190 (2009).
- 663 49 Laflamme, M. A. & Murry, C. E. Heart regeneration. *Nature*. **473**, 326-335 (2011).
- 664 50 Sato, T. *et al.* Effect of electrical stimulation on IGF-1 transcription by L-type calcium  
665 channels in cultured retinal Müller cells. *Japanese journal of ophthalmology*. **52**, 217-223  
666 (2008).
- 667 51 Ito, A. *et al.* Induction of functional tissue-engineered skeletal muscle constructs by defined  
668 electrical stimulation. *Scientific reports*. **4**, 4781 (2014).
- 669 52 Kamioka, H., Maeda, E., Jimbo, Y., Robinson, H. P. & Kawana, A. Spontaneous periodic  
670 synchronized bursting during formation of mature patterns of connections in cortical  
671 cultures. *Neurosci. Lett*. **206**, 109-112 (1996).
- 672 53 Huang, Y. J., Wu, H. C., Tai, N. H. & Wang, T. W. Carbon nanotube rope with electrical  
673 stimulation promotes the differentiation and maturity of neural stem cells. *Small*. **8**, 2869-  
674 2877 (2012).
- 675 54 Shiba, Y. *et al.* Human ES-cell-derived cardiomyocytes electrically couple and suppress  
676 arrhythmias in injured hearts. *Nature*. **489**, 322-325 (2012).
- 677 55 Minami, I. *et al.* A small molecule that promotes cardiac differentiation of human  
678 pluripotent stem cells under defined, cytokine-and xeno-free conditions. *Cell Rep*. **2**, 1448-  
679 1460 (2012).
- 680 56 Minami, I. *et al.* A small molecule that promotes cardiac differentiation of human  
681 pluripotent stem cells under defined, cytokine-and xeno-free conditions. *Cell reports*. **2**,  
682 1448-1460 (2012).
- 683 57 Isomura, A., Hörning, M., Agladze, K. & Yoshikawa, K. Eliminating spiral waves pinned to an  
684 anatomical obstacle in cardiac myocytes by high-frequency stimuli. *Physical Review E*. **78**,  
685 066216 (2008).
- 686 58 Tripathi, S. *et al.* Meta-and orthogonal integration of influenza “OMICs” data defines a role  
687 for UBR4 in virus budding. *Cell host & microbe*. **18**, 723-735 (2015).

688

689

## 690 **Supplementary Information**

691

### 692 **Circulating traveling waves enhance the maturation of hiPSC-derived** 693 **cardiomyocytes in self-organized tissue rings**

694

#### 695 **Mathematical model**

696 We constructed a mathematical model to simulate the phenomena observed in experiments.

697 This model comprises two critical parts: 1) modeling of the action potential (AP) in a cell and

698 2) coupling between two neighboring cells. First, when we simulated the AP of a single

699 human induced pluripotent stem cell-derived cardiomyocyte (hiPSC-CM), we referenced the

700 classic Priebe & Beuckelmann (PB) model<sup>1</sup> of human ventricular AP based on the Hodgkin–

701 Huxley formalism, with the equations derived from experimental data. To increase

702 computational efficiency and stability, we referenced Panfilov’s reformulated model<sup>2</sup> based

703 on the PB model. Unlike human ventricular cells, hiPSC-CMs exhibit an ability to beat

704 spontaneously, indicating that hiPSC-CMs are similar to sinoatrial node cells. Therefore, we

705 added hyperpolarization-activated current<sup>3</sup>,  $I_f$ , to reformulate the PB model. There was

706 evidence that hiPSC-CMs differed significantly from adult ventricular CMs according to their

707 reduced inward rectifier  $K^+$  currents ( $I_{K1}$ ) and the presence of prominent pacemaker currents

708 ( $I_f$ ) that contribute to hiPSC-CM automaticity<sup>4</sup>. Therefore, we changed the maximum

709 conductance value,  $g_{K1}$ , of the inward rectifier  $K^+$  currents ( $I_{K1}$ ) in our mathematical model. A

710 detailed description of the equations governing were described previously<sup>1-3</sup>. Second, there

711 exists a conduction of electrical signals between neighboring cells. Previous studies treated

712 this process using cable equations<sup>5</sup>:

$$713 \frac{\partial V}{\partial t} = \frac{1}{C_m} \frac{a}{2R_1 R_{CG}} \frac{\partial^2 V}{\partial x^2} - \frac{1}{C_m} I_{total} \quad (1)$$



714 
$$R_i = R_{\text{myo}} + \frac{R_g}{\Delta x}$$

715 where  $V$  is the membrane potential,  $C_m$  is the membrane capacity,  $I_{\text{total}}$  is the sum of  
716 individual membrane ionic currents in a single cell,  $a$  is the cell radius,  $\Delta x$  is the length of a  
717 single cell,  $R_{\text{CG}}$  is the ratio between capacitive and geometric areas, and  $R_i$  comprises the  
718 myoplasmic resistance,  $R_{\text{myo}}$ , and gap-junction resistance,  $R_g$ , as shown. By combining and  
719 modifying the above parts, we established a mathematical model of coupled hiPSC-CMs. To  
720 create the model in agreement with our experimental results, we set parameters as follows:  
721  $g_{\text{Na}} = 8 \text{ nS/pF}$ ,  $g_{\text{to}} = 0.35 \text{ nS/pF}$ ,  $g_{\text{K}} = 0.1 \text{ nS/pF}$ ,  $g_{\text{K1}} = 1.17 \text{ nS/pF}$ ,  $g_{\text{f}} = 0.08 \text{ nS/pF}$ ,  $R_g = 0.1\Omega$ ,  
722 and  $R_{\text{myo}} = 0.007 \text{ }\Omega/\text{um}$ . We used  $N$  cells arranged next to each other in one dimension with  
723 periodic boundary conditions to simulate the self-organized tissue ring (SOTR) in the  
724 experiment.

725

### 726 **The dependence of traveling wave (TW) speed on ring diameter**

727 Both in the experiment and the simulation, TW speed increased along with ring diameter (Fig.  
728 3d). A key determinant of TW speed was the difference in membrane potential between the  
729 yet-to-be-activated cell and the neighboring cell that activates it. All hiPSC-CMs are capable  
730 of spontaneously beating, and their APs change periodically. Therefore, maintaining  
731 spontaneous beating ability requires the Funny current (hyperpolarization-activated current<sup>3</sup>),  
732  $I_{\text{f}}$ , which helps resting cells gradually elevate their APs beyond a threshold, followed by the  
733 initiation of depolarization. When stable TWs appear in a ring, the time between two  
734 successive beats becomes shorter than that of its own spontaneous beat rate. This is because  
735 in the case of TWs, the beating of a cell is due to activation by its neighbor, which would  
736 occur prior to its self-activation by the Funny current. The larger the ring diameter, the longer  
737 it will take the TW to traverse it, and the longer a cell waits to be activated by its neighbor.

738 This will bring the cell closer to its own self-activation point, resulting in a more rapid  
 739 activation when the neighbor is activated and a more rapidly propagating TW. The above  
 740 intuitive argument can be quantitatively expressed in the following equations.

$$741 \quad T = n \times Dt \quad (2)$$

742

$$\begin{aligned}
 \frac{\partial V}{\partial t} &= -\frac{1}{C_m} HH(V) + \frac{1}{C_m} D \frac{\partial^2 V}{\partial x^2} \\
 \frac{\partial V_i}{\partial t} &= -\frac{1}{C_m} HH(V_i) + \frac{1}{C_m} \frac{D}{Dx^2} \{(V_{i+1} - V_i) - (V_i - V_{i-1})\} \\
 \frac{\partial V_i}{\partial t} &= -\frac{1}{C_m} HH(V_i) + \frac{1}{C_m} \frac{D}{Dx^2} \{(V_i(t - Dt) - V_i(t)) - (V_i(t) - V_i(t + Dt))\} \\
 \frac{\partial V_i}{\partial t} &= -\frac{1}{C_m} HH(V_i) + \frac{1}{C_m} \frac{D}{Dx^2} \{(V_i(t - \frac{T}{n}) - V_i(t)) - (V_i(t) - V_i(t + \frac{T}{n}))\}
 \end{aligned}$$

743 (3)

744

$$745 \quad V_i(t) = V_i(t + T) \quad (4)$$

746

747 T: the time for one TW to travel around the ring

748 n: the number of cells

749  $\Delta t$ : the difference in time between the point at which the electrical signal arrives at two  
 750 adjacent cells

751 V: membrane potential

752  $V_i$ : the membrane potential of the  $i^{\text{th}}$  cell

753 HH(V): derivation of V and I using the HH equation

754 D: diffusion coefficient

755

756 Given the diameter of the ring, the number of cells is determined (n). Using the  
 757 periodic boundary condition (Eq. 4), the above equations can be solved to find a relationship

758 between the cycle time of the membrane potential of a single cell and the diameter of the ring  
759 (Supplementary Fig. 4a).

760 To verify the accuracy of the above explanation, we performed two simulations. First,  
761 the Funny current resulted in different AP differences between the two adjacent cells at the  
762 wave front in rings with different diameters. Therefore, we deleted the Funny current in every  
763 cell, resulting in the loss of spontaneous beating ability and an inability of its AP to change in  
764 the resting state over time. This meant that whenever a cell was activated, the difference in  
765 AP between the activating cell and the activated cell would be the same, regardless of the  
766 diameter of the ring. In this simulation, we found that the diameter of the ring did not affect  
767 TW velocity, suggesting that transmitted electrical signals in different ring diameters had no  
768 effect on speed due to their shared difference in electrical potential (Supplementary Fig. 4b).

769 Second, we artificially raised the minimum membrane potential of cells in the resting  
770 state and maintained their excitable characteristics (with no Funny current). Unlike the first  
771 simulation, we established gradients of differences in electrical potential between activating  
772 and activated cells. After measuring the propagation velocity of the TWs, we found that the  
773 propagation speed decreased as the difference in electrical potential increased  
774 (Supplementary Fig. 4c).

775 These two simulations demonstrated that different TW speeds in rings of different  
776 diameters were caused by differences in the electrical potential between activated and  
777 activating cells. The smaller the ring diameter, the greater the difference in electrical potential  
778 and the smaller the propagation speed.

779

## 780 **Reference**

- 781 1. Priebe, L. & Beuckelmann, D. J. Simulation study of cellular electric properties in  
782 heart failure. *Circ Res* **82**, 1206–1223 (1998).

- 783 2. Panfilov, a V. a. of Human Ventricular Cells. **281**, 2296–2308 (2002).
- 784 3. Verkerk, A. O., Van Borren, M. M. G. J. & Wilders, R. Calcium transient and sodium-  
785 calcium exchange current in human versus rabbit sinoatrial node pacemaker cells. *Sci.*  
786 *World J.* **2013**, (2013).
- 787 4. Karakikes, I., Ameen, M., Termglinchan, V. & Wu, J. C. Human Induced Pluripotent  
788 Stem Cell-Derived Cardiomyocytes: Insights into Molecular, Cellular, and Functional  
789 Phenotypes. *Circ. Res.* **117**, 80–88 (2015).
- 790 5. Shaw, R. M. & Rudy, Y. Ionic mechanisms of propagation in cardiac tissue. Roles of  
791 the sodium and L-type calcium currents during reduced excitability and decreased gap  
792 junction coupling. *Circ. Res.* **81**, 727–741 (1997).

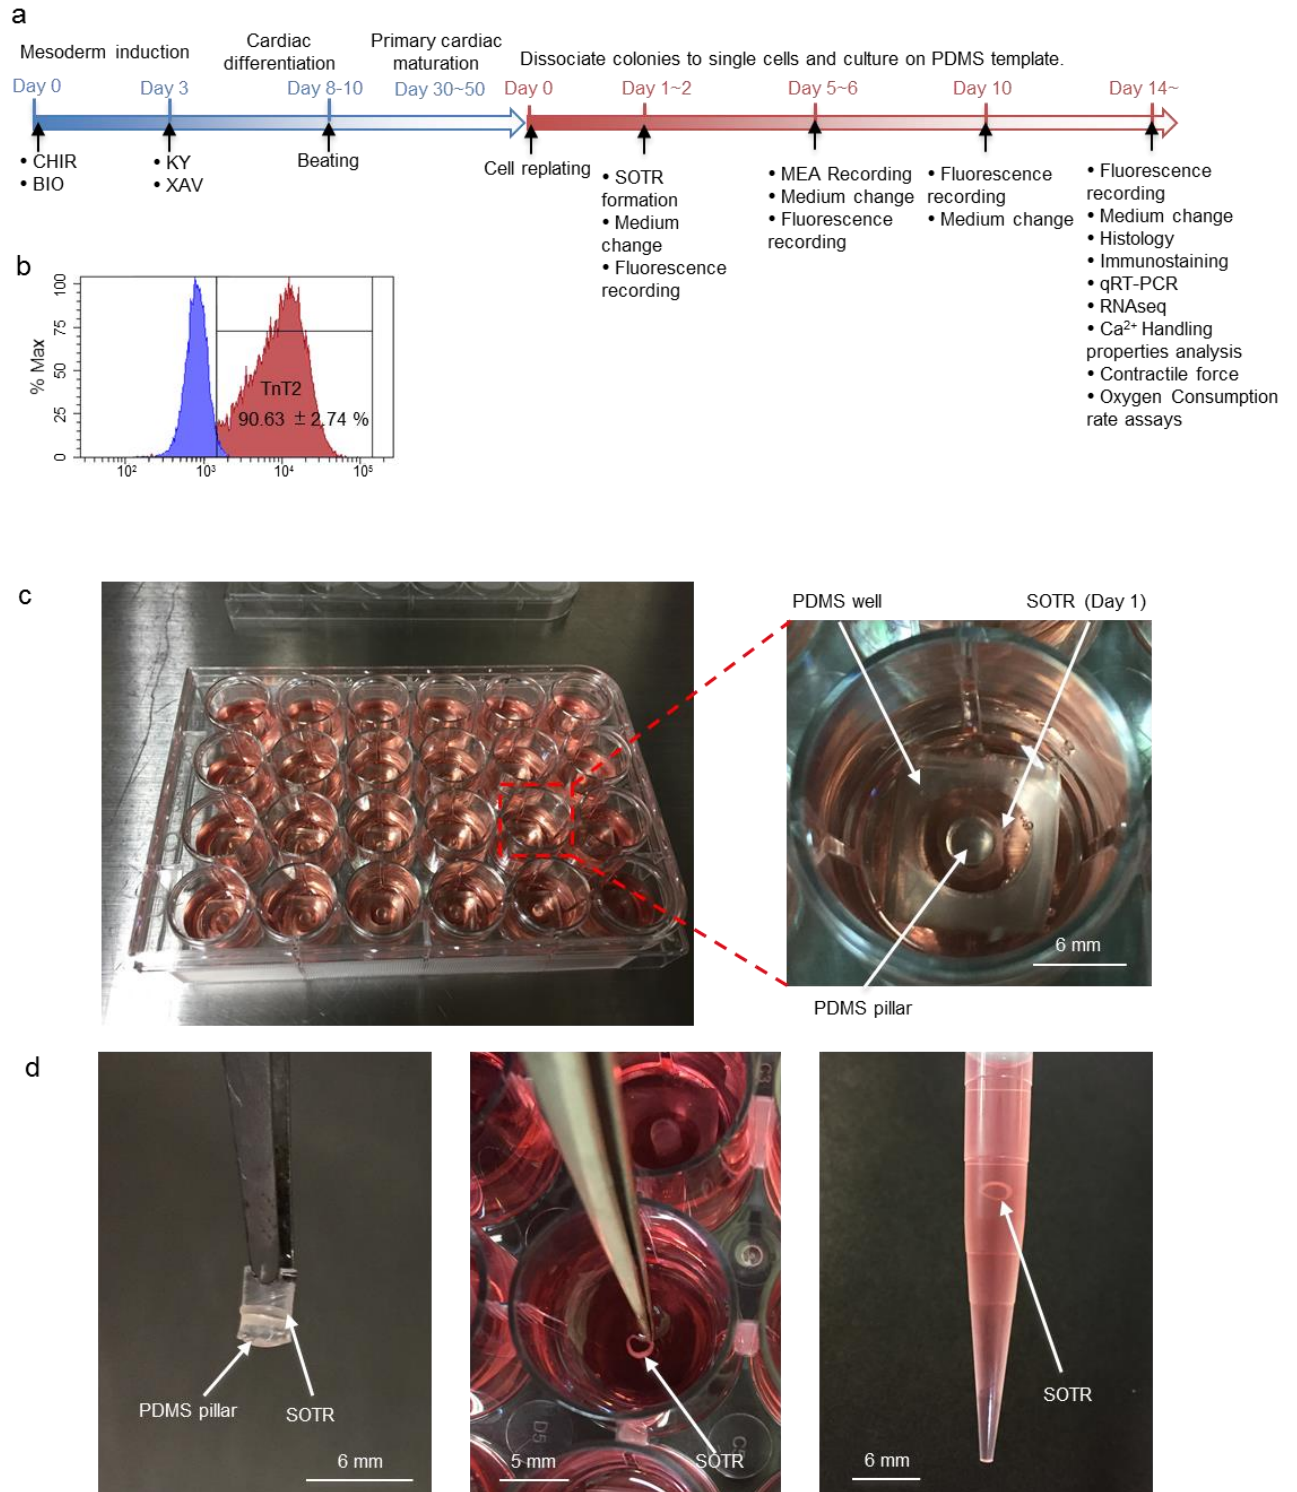

793

794 **Supplementary Figure 1. SOTR formation.** (a) Schematic representation of CM  
795 differentiation and functional assessment in SOTRs. (b) Flow cytometric analysis of the CMs  
796 used for generating SOTRs. (mean ± s.d.;  $n = 4$ ) (c) SOTRs in a 24-well culture dish. The  
797 enlarged figure shows the PDMS well and pillar, between which the cells were plated and

798 organized into a tissue ring. (d) SOTR with a PDMS pillar on day 14. The SOTR could be  
799 removed from the pillar and transferred with a pipette.

800

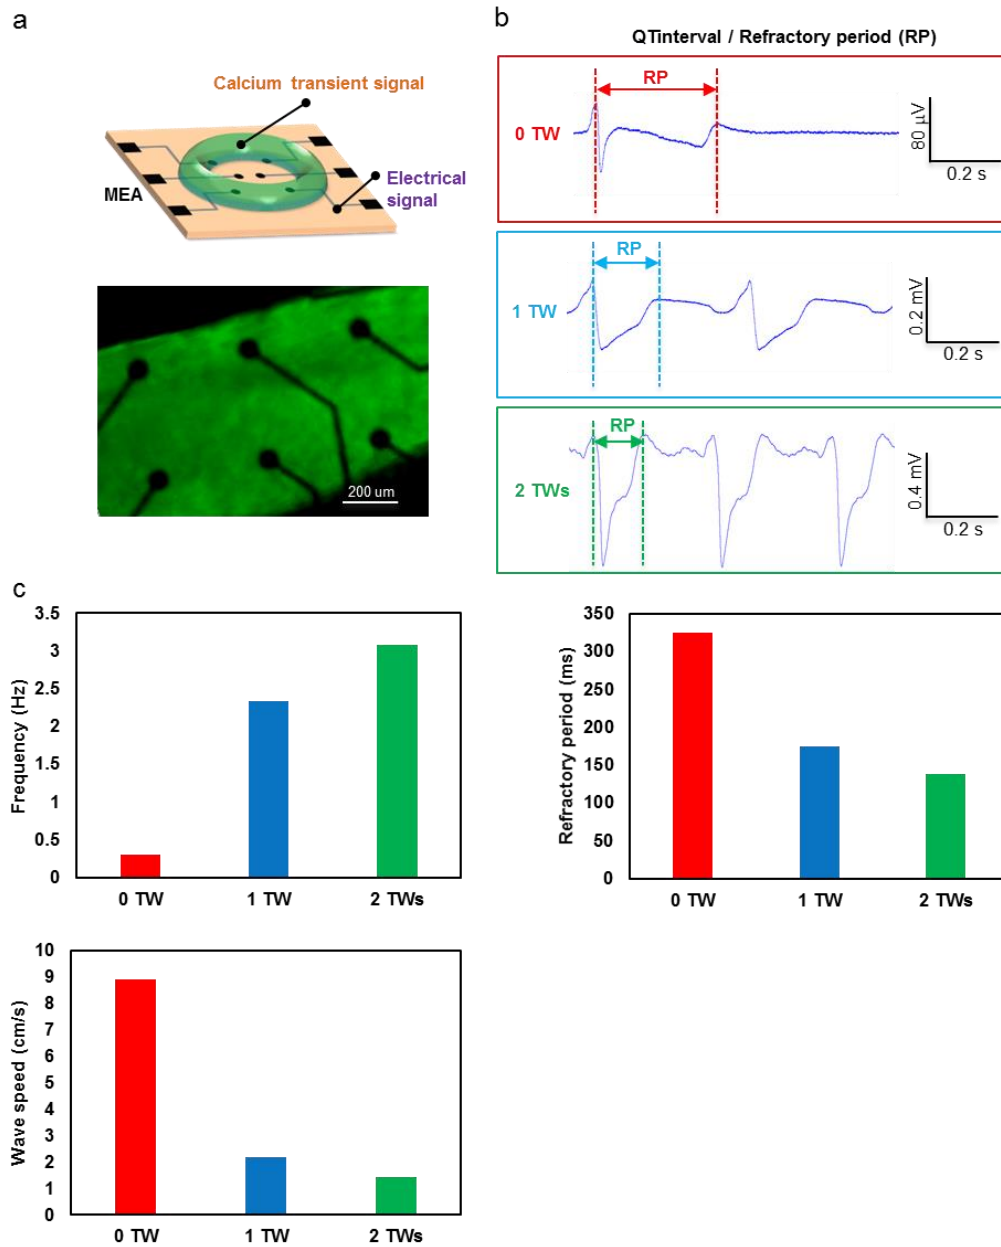

801

802 **Supplementary Figure 2. FP recording by micro-electrode arrays.** (a) Representative

803 setup for FP recording by electrodes underneath a SOTR on day 6. See also supplementary

804 video 5. (b) Representative FP recorded by an electrode underneath a SOTR with or without

805 TWs. (c) Frequency, QT interval (correlated with AP duration and refractory period), and  
806 wave speed in SOTRs with or without TWs.

807  
808

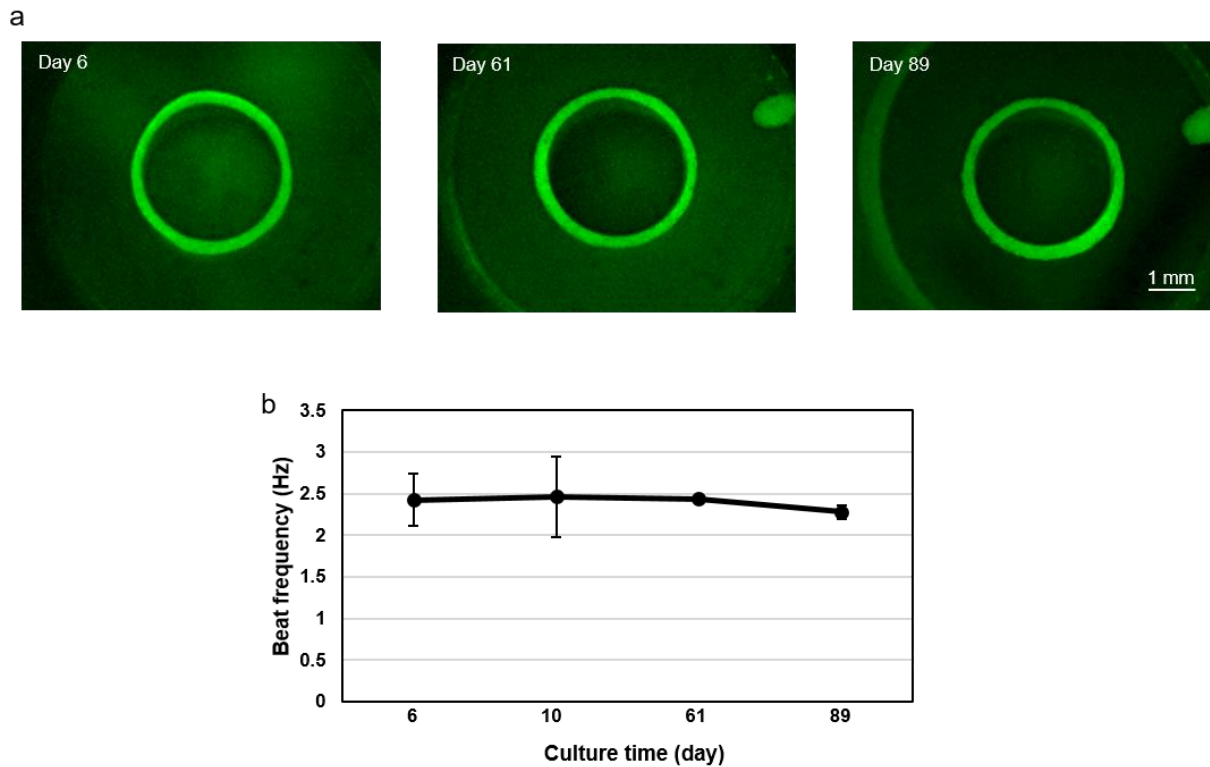

809

810 **Supplementary Figure 3. Maintenance of TWs in SOTRs for >89 days.** (a) Fluorescence  
811 images of a SOTR with one TW at different culture times. (b) The beat rate (Hz) of SOTRs  
812 with one TW during a long-term culture (mean  $\pm$  s.d.;  $n = 3$ ).

813

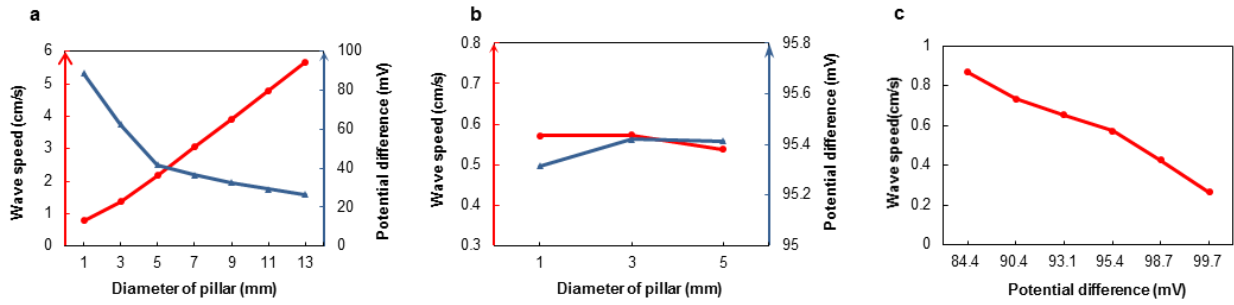

814

815 **Supplementary Figure 4. Relationships between TW speed and differences in**

816 **membrane potential.** (a) Relationships between TW speed, differences in electrical potential

817 between neighboring cells just before activation (at the front tip of the wave), and ring

818 diameter. The blue line represents the TW speed, and the orange line represents the difference

819 in electrical potential. (b) The diameter of the ring does not affect TW velocity when cells

820 lose the Funny current. The blue line represents TW velocity, and the orange line represents

821 the difference in electrical potential. (c) Differences in electrical potential affect TW speed.

822



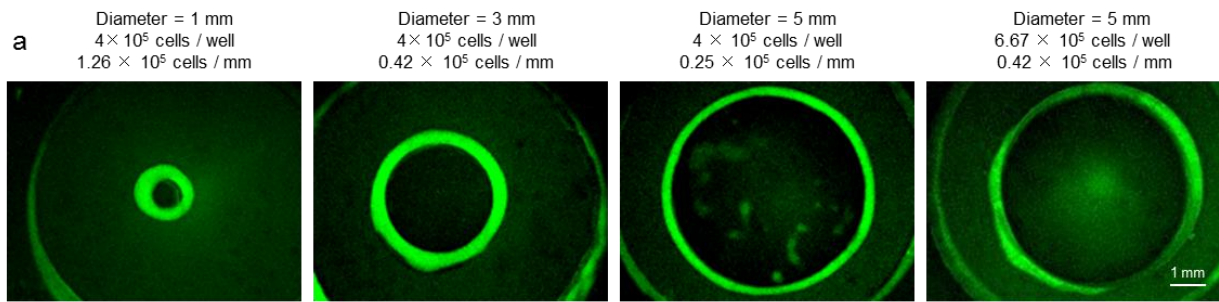

**b**

| Cell density                                       | Ratio of SORTs with TWs (Day 6) |                |               |
|----------------------------------------------------|---------------------------------|----------------|---------------|
|                                                    | Dia. = 1 mm                     | Dia. = 3 mm    | Dia. = 5 mm   |
| $4 \times 10^5$ cells / well (fixed cell number)   | 13.51% (n=37)                   | 91.02% (n=156) | 48.15% (n=27) |
| $0.42 \times 10^5$ cells / mm (fixed cell density) | N/A*                            |                | 83.33% (n=60) |

\* Unable to form SOTRs

823

824 **Supplementary Figure 5. SOTR formation using pillars with different diameters. (a)**

825 Fluorescence images of GCaMP3-positive SOTRs with different diameters at day 6. (b)

826 Percentage of SORTs with TWs on day 6 after cell plating with different pillar diameters.

827

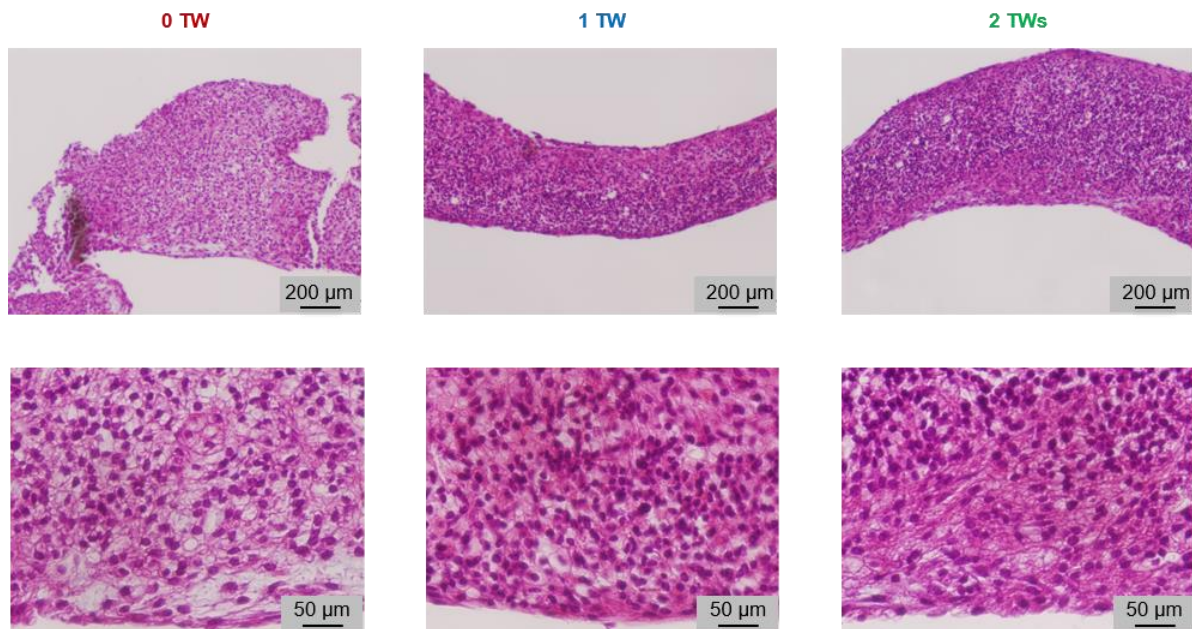

828

829 **Supplementary Figure 6. Histology of SOTRs with different TWs on day 6 after cell**

830 **plating.**

831
